# Supplementary material for: One electron reduction transforms high-valent low-spin cobalt alkylidene into high-spin cobalt(ii) carbene radical
Source: Royal Society of Chemistry journal article supplement (doi:10.1039/d0cc03028g), 2020-01-01
Supplement: d0cc03028g1.pdf [file d0cc03028g1.pdf]

## Electronic Supplementary Information

### One Electron Reduction Transforms High-Valent Low-Spin Cobalt Alkylidene into High-Spin Cobalt(II) Carbene Radical

Amanda Grass,<sup>a</sup> James A. Bellow,<sup>a</sup> Gregory Morrison,<sup>b</sup> Hans-Conrad zur Loye,<sup>b</sup> Richard L. Lord,<sup>c\*</sup> Stanislav Groysman<sup>a\*</sup>

<sup>a</sup>Department of Chemistry, Wayne State University, 5101 Cass Ave, Detroit, MI, 48202, USA.

<sup>b</sup>Department of Chemistry and Biochemistry, University of South Carolina, Columbia, SC 29208, USA

<sup>c</sup>Department of Chemistry, Grand Valley State University, Allendale, MI, 49401, USA.

## ***Table of Contents***

|                                                                                         |            |
|-----------------------------------------------------------------------------------------|------------|
| 1. Synthesis and characterization of complexes                                          | <b>S3</b>  |
| 2. X-ray crystallographic details and structures of <b>3a</b> and <b>5</b>              | <b>S7</b>  |
| 3. Evans' method formula and procedure                                                  | <b>S10</b> |
| 4. NMR and GC-MS spectra                                                                | <b>S11</b> |
| 5. IR spectra                                                                           | <b>S20</b> |
| 6. UV-vis spectra                                                                       | <b>S23</b> |
| 7. SQUID measurements                                                                   | <b>S26</b> |
| 8. Computational data                                                                   | <b>S29</b> |
| 9. Scheme demonstrating quinoidal distortion in the structures of <b>2</b> and <b>3</b> | <b>S40</b> |
| 10. References                                                                          | <b>S41</b> |

## 1. Synthesis and Characterization of Complexes

**General.** All reactions involving air-sensitive materials were executed in a nitrogen-filled glovebox or by standard Schlenk line procedures. Cobalt chloride, bis(pentamethylcyclopentadienyl)cobalt(II), 2,6-dimethylphenyl isocyanide, and trimethoxybenzene were purchased from Sigma-Aldrich. Adamantyl isocyanide was purchased from Alfa Aesar. Potassium graphite and thallium hexafluorophosphate were purchased from Strem. The syntheses of complexes **1** and **2** were reported previously.<sup>1,2</sup> Diphenyldiazomethane were synthesized according to a reported literature procedure.<sup>3</sup> All solvents were purchased from Fisher Scientific and were of HPLC grade. The solvents were purified using an MBRAUN solvent purification system and stored over 3 Å molecular sieves. Deuterated benzene (C<sub>6</sub>D<sub>6</sub>) was purchased from Cambridge Laboratories and deuterated tetrahydrofuran (THF-d<sub>8</sub>) was obtained from Sigma Aldrich. Both were degassed under argon, and stored over 3 Å molecular sieves. The complexes were characterized using NMR, IR, and UV/vis spectroscopy, X-ray crystallography, SQUID magnetometry, elemental analysis, and solution magnetometry by the Evans method. NMR and GC-MS spectra were recorded at the Lumigen Instrument Center (Wayne State University). NMR was performed on a Varian Mercury or Agilent 400 MHz Spectrometer in C<sub>6</sub>D<sub>6</sub> or THF-d<sub>8</sub> at room temperature. Chemical shifts and coupling constants (J) were reported in parts per million (δ) and hertz (Hz), respectively. IR spectra of powdered samples were recorded on a Shimadzu IR Affinity-1 FT-IR Spectrometer outfitted with a MIRacle10 attenuated total reflectance accessory with a monolithic diamond crystal stage and pressure clamp. UV–visible spectra were obtained on a Shimadzu UV-1800 spectrometer. SQUID magnetometry was performed at the Magnetic Properties Measurement System Facility

at University of South Carolina. Elemental analyses were performed by Midwest Microlab LLC. Formation of the ketenimine and organic byproducts was confirmed by GC-MS using Agilent 6890N spectrometer, Thermo TG5MS 30 m  $\times$  0.32 mm  $\times$  0.25  $\mu$ m column, 7683 series injector, and Agilent 5973 detector.

**Synthesis of [Co(OR<sub>2</sub>)(CPh<sub>2</sub>)] [CoCp\*<sub>2</sub>] (**3**).** A suspension of CoCp<sub>2</sub>\* (46 mg, 0.138 mmol) in diethyl ether was added to a stirring dark-brown ether solution of Co(OR)<sub>2</sub>(CPh<sub>2</sub>) (**2**, 85 mg, 0.128 mmol) at -35°C. There was an immediate color change to lighter brown. The reaction was allowed to warm to room temperature and stirred for 1 hour. The solution was filtered, washed with diether ether, dissolved in THF, filtered, and dried in vacuo. Subsequent recrystallization of a THF solution layered with diethyl ether at -35°C yields X-ray quality crystals of **3** (76 mg, 60% yield). <sup>1</sup>H NMR (400 MHz, THF-d<sub>8</sub>)  $\delta$  108.4 (5H, Ph),  $\delta$  45.4 (1H, OR- Ph),  $\delta$  11.4 (2H, OR-Ph),  $\delta$  8.10 (5H, OR-Ph),  $\delta$  7.74 (4H, OR-Ph),  $\delta$  6.19 (18H, OR-<sup>t</sup>Bu), -4.46 (30H, Cp\*), -44.22 (5H, Ph). IR (cm<sup>-1</sup>): 2974 (w), 2947 (w), 2885 (w), 1558 (m), 1474 (m), 1377 (m), 1280 (w), 1142 (w), 1061 (s), 1022 (w), 945 (m), 891 (m), 844 (w), 799 (w), 741 (m), 702 (s).  $\lambda_{\text{max}}$  ( $\epsilon_{\text{M}}$  (L<sup>-1</sup> cm<sup>-1</sup> mol<sup>-1</sup>) 500 nm (2040), 648 nm (760), 712 nm (590).  $\mu_{\text{eff}}$  (Evans method) = 4.2  $\pm$  0.2  $\mu_{\text{B}}$  (calcd 4.9). Anal. Calcd for C<sub>63</sub>H<sub>92</sub>O<sub>2</sub>Co<sub>2</sub>: C, 75.72; H, 9.28, Found: C, 76.08; H, 8.92.

**Synthesis of [Co(OR<sub>2</sub>)(CPh<sub>2</sub>)] [K(18-crown-6)] (**4**).** A THF solution of 18-crown-6 (41 mg, 0.154 mmol) in was added to a stirring dark-brown THF solution of Co(OR)<sub>2</sub>(CPh<sub>2</sub>) (88 mg, 0.132 mmol), followed by a suspension of KC<sub>8</sub> (24 mg, 0.175 mmol) in THF. There was a color change to russet brown after 5 minutes and the reaction was stirred for 1 hour at room temperature. Solvent was removed in vacuo to afford a brown residue. The residue was dissolved in a solution of 15:1 diethyl ether:THF, filtered, and washed with additional diethyl ether. The filtrate was concentrated in vacuo. Subsequent recrystallization at -35 °C yields crystals of **4** (50

mg, 39% yield). IR ( $\text{cm}^{-1}$ ): 2970 (w), 2940 (w), 2886 (w), 1473 (w), 1350 (w), 1103 (s), 1065 (s), 964 (m), 748 (m), 702 (s).  $\lambda_{\text{max}}$  ( $\epsilon_{\text{M}} (\text{L cm}^{-1} \text{mol}^{-1})$ ) 503 nm (620), 651 nm (200), 712 nm (160). Anal. Calcd for  $\text{C}_{55}\text{H}_{80}\text{O}_8\text{Co}$ : C, 68.30; H, 8.34 Found: C, 67.97; H, 8.37.

**Reaction of  $[\text{Co}(\text{OR}_2)(\text{CPh}_2)][\text{CoCp}^*_2]$  with 2,6-dimethylphenyl isocyanide.** A benzene solution of  $\text{CN}(2,6\text{-Me}_2\text{C}_6\text{H}_3)$  (40 mg, 0.303 mmol) in benzene was added to a stirring solution of  $[\text{Co}(\text{OR}_2)(\text{CPh}_2)][\text{CoCp}^*_2]$  (93 mg, 0.0962 mmol) in benzene at room temperature. There was a color change to dark purple-black after 20 minutes and solution was stirred for an additional 2 hours. Solvent was removed in vacuo to afford a dark purple residue. The residue was dissolved in diethyl ether, filtered, and washed with additional diethyl ether. The filtrate was concentrated in vacuo and subsequent recrystallization at  $-35^\circ\text{C}$  yielded mixture of X-ray quality crystals of orange  $\text{Co}_2(\text{CN}(2,6\text{-Me}_2\text{C}_6\text{H}_3))_8$  (**5**) and purple  $\text{CoCp}^*_2(\text{Me}_2\text{C}_5\text{Me}_2\text{C}(\text{H})(\eta^2\text{C}(\text{CN}(2,6\text{-Me}_2\text{C}_6\text{H}_3)))(\text{C}(\text{H})\text{Ph}_2))$  (**6**). The products display similar solubility in organic solvents and crystallize together. Orange and purple crystals were mechanically separated to give 22 mg (20% yield) of **5** and 22 mg (49%) of **6**, and further characterized. Synthesis, spectroscopic and structural characterization of orange  $\text{Co}_2(\text{CN}(2,6\text{-Me}_2\text{C}_6\text{H}_3))_8$  was previously reported.<sup>4</sup>  $^1\text{H}$  NMR spectrum of **5** matched literature spectrum and is reported below.  $^1\text{H}$  NMR (400 MHz,  $\text{C}_6\text{D}_6$ ) of **5**:  $\delta$  6.78 (br, 24H), 2.39 (s, 48H). **6** was characterized by X-ray crystallography, IR spectroscopy,  $^1\text{H}$  NMR spectroscopy, and UV-vis spectroscopy. IR ( $\text{cm}^{-1}$ ): 2917 (w), 2855 (w), 2381 (w), 2045 (s), 2014 (s), 1667 (s), 1582 (m), 1458 (m), 1373 (w), 1188 (m), 1126 (w), 1057 (w), 957 (m), 764 (m), 741 (m), 656 (s).  $^1\text{H}$  NMR (400 MHz,  $\text{C}_6\text{D}_6$ )  $\delta$  7.53 (d, 4H, o-Ph),  $\delta$  7.16 (t, 8H, m-Ph),  $\delta$  7.08 (t, 3H,  $\text{NC}_6\text{H}_3$ ), 6.98 (t, 2H, p-Ph),  $\delta$  5.34 (s, 1H,  $\text{Me}_2\text{C}_5\text{Me}_2\text{CH}$ ),  $\delta$  3.82 (s, 6H,  $\text{CHPh}_2$ ), 2.22 (s, 6H,  $\text{Me}_2\text{C}_6\text{H}_3$ ),  $\delta$  1.58 (bs, 6H,  $\text{Me}_2\text{C}_5\text{Me}_2\text{CH}$ ),  $\delta$  1.33 (s, 15H,  $\text{Cp}^*$ ),  $\delta$  1.27 (s, 6H,  $\text{Me}_2\text{C}_5\text{Me}_2\text{CH}$ ).  $\lambda_{\text{max}}$  ( $\epsilon_{\text{M}} (\text{L cm}^{-1} \text{mol}^{-1})$ ) 550 (12071).

**Reaction of  $[\text{Co}(\text{OR}_2)(\text{CPh}_2)][\text{K}(18\text{-crown-6})]$  with 2,6-dimethylphenyl isocyanide.** A solution of  $\text{CN}(2,6\text{-Me}_2\text{C}_6\text{H}_3)$  (8.7 mg, 0.0663 mmol) in benzene/ether was added to a stirring solution of  $[\text{Co}(\text{OR})_2(\text{CPh}_2)][\text{K}(18\text{-crown-6})]$  (50 mg, 0.0519 mmol) in benzene/ether at  $-35^\circ\text{C}$ . There was a color change to dark green immediately and solution was stirred for 45 minutes, after which the solution transitions to a greenish brown. Solvent was removed in vacuo to afford a dark brown-green residue. The residue was washed repeatedly with hexanes.  $^1\text{H}$  NMR of the residue shows formation of the previously reported ketenimine<sup>5</sup> and  $\text{Co}_2(\text{CN}(2,6\text{-Me}_2\text{C}_6\text{H}_3))_8$  (**5**).<sup>4</sup> The hexane washings were concentrated at  $-35^\circ\text{C}$  to afford **5** in 18% yield.

**Reaction of  $[\text{Co}(\text{OR}_2)(\text{CPh}_2)][\text{CoCp}^*_2]$  with adamantyl isocyanide.** A ether solution of  $\text{CNAd}$  (21 mg, 0.130 mmol) was added to a stirring brown-green suspension of  $[\text{Co}(\text{OR}_2)(\text{CPh}_2)][\text{CoCp}^*_2]$  (29 mg, 0.029 mmol) in ether at room temperature. After 20 minutes, the reaction turned russet brown. The solution gradually darkened and was stirred for 3 hours total at room temperature. The solvent was removed in vacuo to afford a dark brown residue. The residue was dissolved in a 1:1 hexane:ether solution and filtered through a silica plug. The solvent was removed in vacuo and the faint yellow oil was shown by  $^1\text{H}$  NMR to be the previously reported ketenimine (approximately 55% yield), in addition to free isocyanide and hydrolyzed ligand. GC-MS confirmed the presence of the ketenimine as the major product.

## 2. X-ray crystallographic details and structures of **3a** and **5**

The structures of **3**, **3a**, **5**, and **6** were confirmed by X-ray analysis. The structures of **2** and **5** was previously reported.<sup>2,4b</sup> Whereas the crystal data parameters for **5** matched those previously reported,<sup>4b</sup> its refinement parameters are slightly different and therefore are reported here. The crystals were mounted on a Bruker APEXII/Kappa three circle goniometer platform diffractometer equipped with an APEX-2 detector. A graphic monochromator was employed for wavelength selection of the Mo K $\alpha$  radiation ( $\lambda = 0.71073$  Å). The data were processed and the structure was solved using the APEX-2 software supplied by Bruker-AXS. The structure was refined by standard difference Fourier techniques with SHELXL (6.10 v., Sheldrick G. M., and Siemens Industrial Automation, 2000). Hydrogen atoms were placed in calculated positions using a standard riding model and refined isotropically; all other atoms were refined anisotropically. The structure of **3a** was of relatively low quality, due to weak diffraction and the disordered solvent. As we were not able to model the solvent satisfactorily, SQUEEZE was used.

**Table S1.** Crystal data and structure refinement for **3**, **3a**, **5**, and **6**.

|                                            | <b>3</b>                                                       | <b>3a</b>                                                         | <b>5</b>                                                       | <b>6</b>                            |
|--------------------------------------------|----------------------------------------------------------------|-------------------------------------------------------------------|----------------------------------------------------------------|-------------------------------------|
| formula                                    | C <sub>63</sub> H <sub>86</sub> Co <sub>2</sub> O <sub>2</sub> | 0.5C <sub>63</sub> H <sub>86</sub> Co <sub>2</sub> O <sub>2</sub> | C <sub>72</sub> H <sub>72</sub> Co <sub>2</sub> N <sub>8</sub> | C <sub>42</sub> H <sub>48</sub> CoN |
| fw                                         | 993.18                                                         | 496.59                                                            | 1167.24                                                        | 625.74                              |
| crystal system                             | Triclinic                                                      | Monoclinic                                                        | Triclinic                                                      | Orthorhombic                        |
| space group                                | <i>P</i> -1                                                    | <i>C</i> 2/ <i>c</i>                                              | <i>P</i> -1                                                    | <i>Pbcn</i>                         |
| <i>a</i> (Å)                               | 12.0917(7)                                                     | 19.276(7)                                                         | 12.0255(6)                                                     | 14.6058(7)                          |
| <i>b</i> (Å)                               | 13.2206(7)                                                     | 15.481(6)                                                         | 13.8796(7)                                                     | 14.6784(7)                          |
| <i>c</i> (Å)                               | 18.3083(10)                                                    | 20.600(8)                                                         | 21.0959(10)                                                    | 30.7441(13)                         |
| $\alpha$ (deg)                             | 83.843(3)                                                      | 90.00                                                             | 98.389(3)                                                      | 90.00                               |
| $\beta$ (deg)                              | 74.551(3)                                                      | 101.414(11)                                                       | 99.020(3)                                                      | 90.00                               |
| $\gamma$ (deg)                             | 73.230(3)                                                      | 90.00                                                             | 113.189(3)                                                     | 90.00                               |
| <i>V</i> (Å <sup>3</sup> )                 | 2699.6(3)                                                      | 6026(4)                                                           | 3111.9(3)                                                      | 6591.2(5)                           |
| <i>D<sub>c</sub></i> (g cm <sup>-3</sup> ) | 1.222                                                          | 1.095                                                             | 1.246                                                          | 1.261                               |
| <i>Z</i>                                   | 2                                                              | 8                                                                 | 2                                                              | 8                                   |
| $\mu$ (mm <sup>-1</sup> )                  | 0.657                                                          | 0.588                                                             | 0.582                                                          | 0.551                               |
| <i>T</i> (K)                               | 100(2)                                                         | 100(2)                                                            | 100(2)                                                         | 100(2)                              |
| <i>R<sub>I</sub></i>                       | 0.0335                                                         | 0.1046                                                            | 0.0505                                                         | 0.0474                              |
| GOF                                        | 1.023                                                          | 0.976                                                             | 1.000                                                          | 0.962                               |

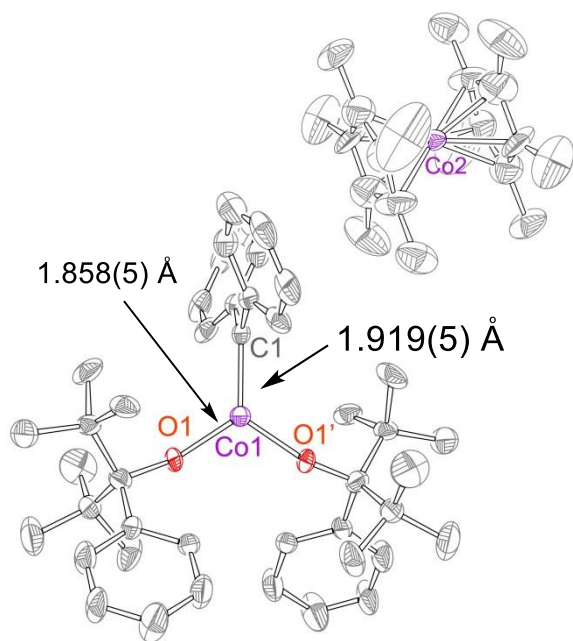

**Figure S1.** X-ray structure (50% probability ellipsoids) of **3a**, with selected bonds shown.



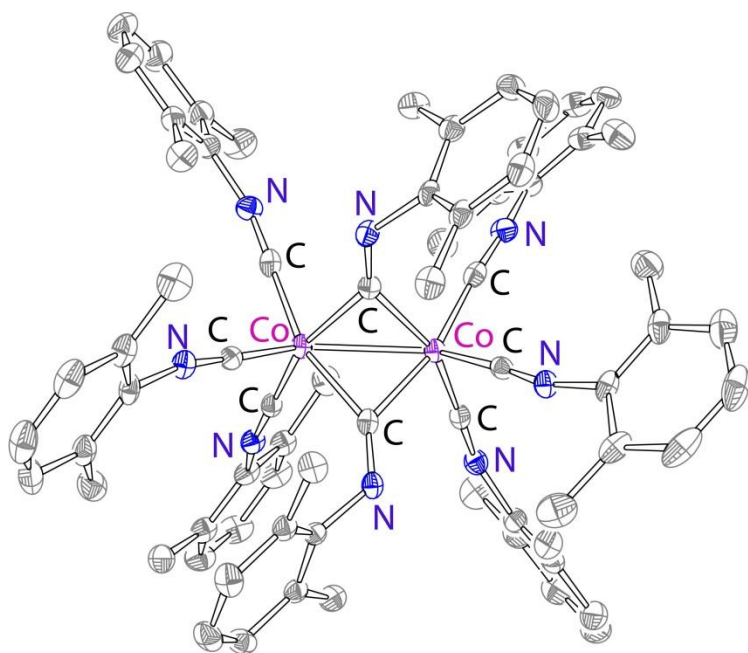

**Figure S2.** X-ray structure (50% probability ellipsoids) of **5**, with selected bonds shown.

### 3. Evans' method formula and procedure

The Evans method was performed on all complexes using a Wilmad coaxial insert (purchased from Aldrich) and a standard NMR tube. The sample was carefully weighed (10 – 20 mg) and dissolved in 1.00 mL C<sub>6</sub>D<sub>6</sub> to afford solutions with known concentrations to perform the calculations. The solutions were added to the insert, and the insert was placed inside the outer NMR tube, which contained C<sub>6</sub>D<sub>6</sub>. NMR spectra were taken. The molar susceptibility  $\chi_m$  of the compound was first calculated using Equation 1:<sup>6</sup>

$$\chi_m = \left[ \frac{3\Delta\nu}{4\pi m\nu_0} + \chi_0 \right] M \quad (1)$$

where  $\Delta\nu$  is the peak separation (Hz),  $m$  is the concentration of the solution (g/mL),  $\nu_0$  is the spectrometer operating frequency in Hertz,  $\chi_0$  is the molar susceptibility of the solvent (in cm<sup>3</sup>/g), and  $M$  is the molar mass of the compound (g/mol). Diamagnetic corrections were calculated using Pascals constants. The solution state effective magnetic moment ( $\mu_{eff}$ ) was calculated using Equation 2:

$$\mu_{eff} = \sqrt{(2.383 \times 10^3)(\chi_m)} \quad (2)$$

Three measurements were taken, the average of the three and the corresponding standard deviation were calculated. The uncertainty was estimated to be ~ 10%, based on weight measurement uncertainty.

**Table S2.** Observed magnetic moment for complex **3** using the Evans method ( $\mu_{obs}$  ( $\mu_B$ )).

|                          | <b>3</b> |
|--------------------------|----------|
| 1                        | 4.35     |
| 2                        | 4.07     |
| 3                        | 4.27     |
| average                  | 4.23     |
| standard deviation       | 0.15     |
| $\mu_{calc}$ ( $\mu_B$ ) | 4.90     |

#### 4. NMR and GC-MS Spectra

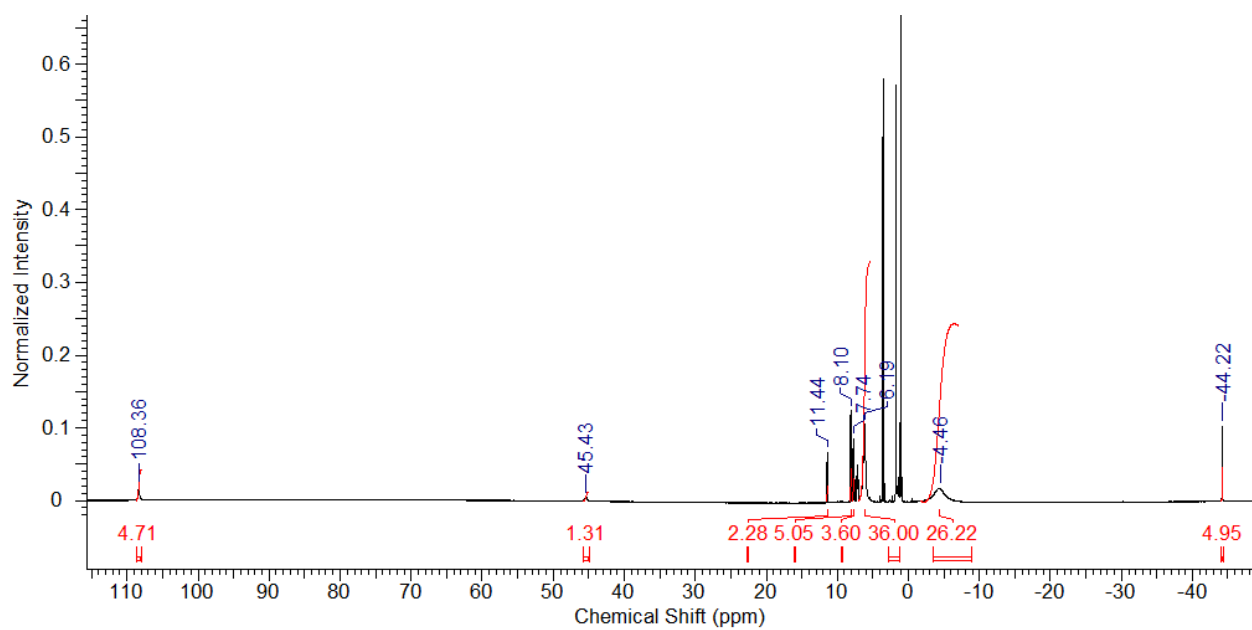

**Figure S3.**  $^1\text{H}$  NMR spectrum of  $[\text{Co}(\text{OR})_2(\text{CPh}_2)][\text{CoCp}^*_2]$  (**3**).

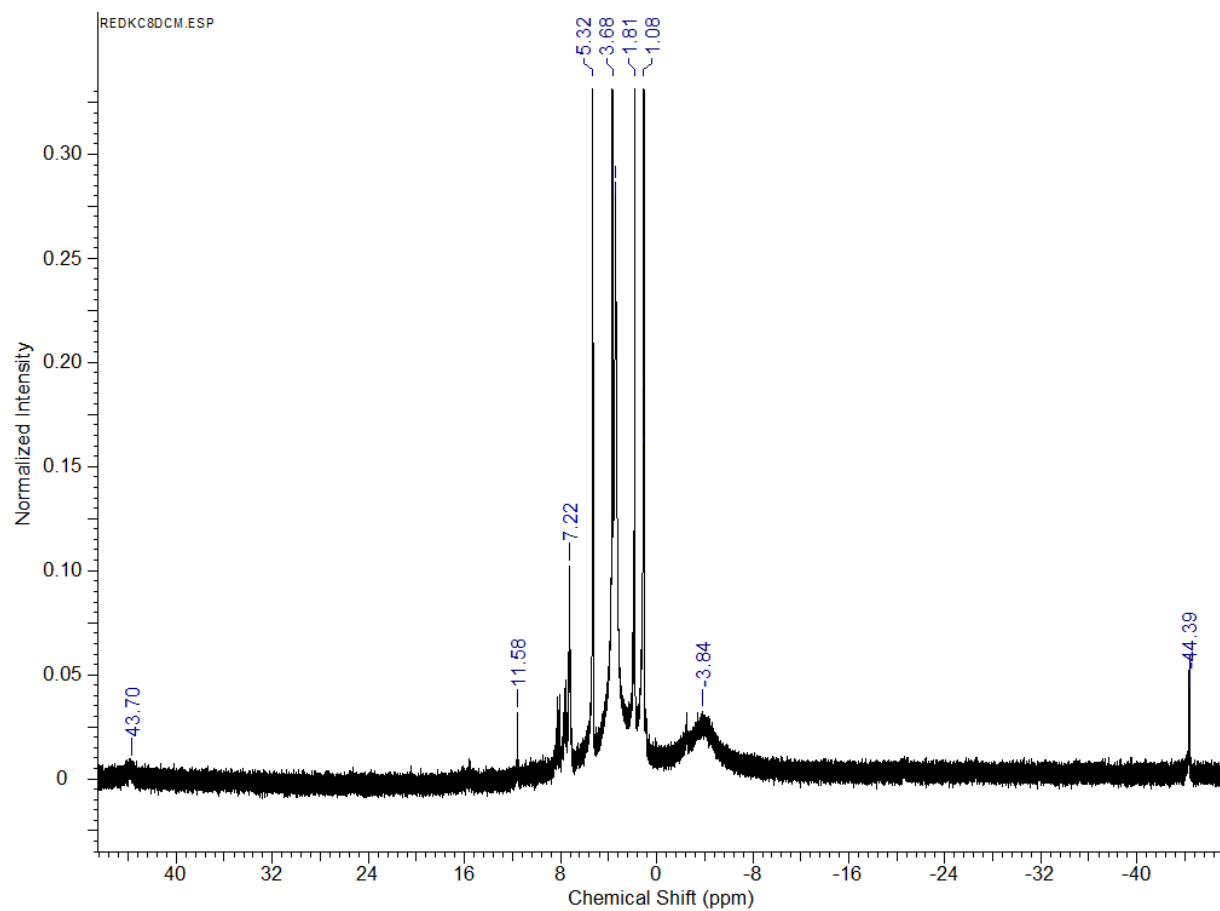

**Figure S4.**  $^1\text{H}$  NMR spectrum ( $\text{CD}_2\text{Cl}_2$ ) of  $[\text{Co}(\text{OR})_2(\text{CPh}_2)][\text{K}(18\text{-crown-6})]$ .

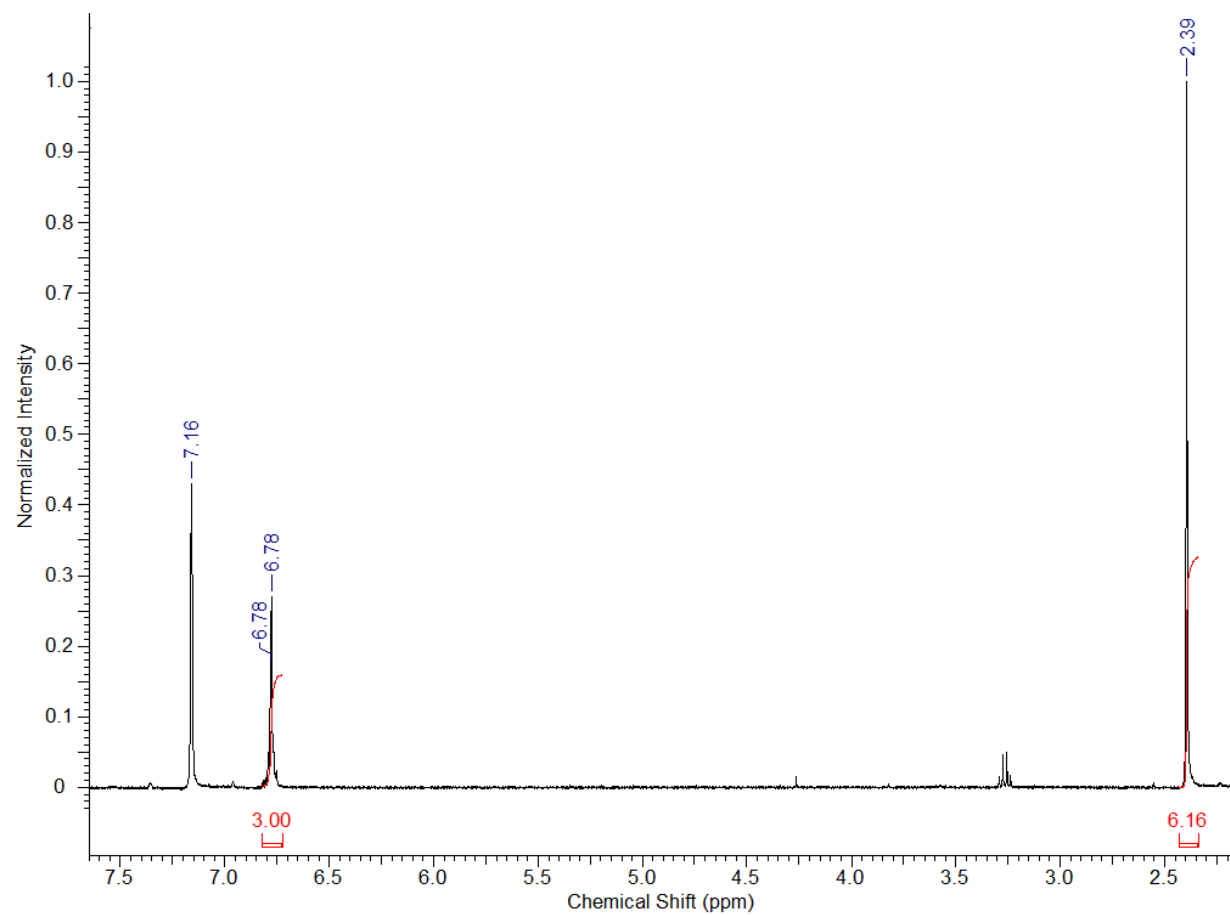

**Figure S5.**  $^1\text{H}$  NMR spectrum of  $\text{Co}_2(\text{CN}(2,6\text{-Me}_2\text{C}_6\text{H}_3))_8$  (**5**).

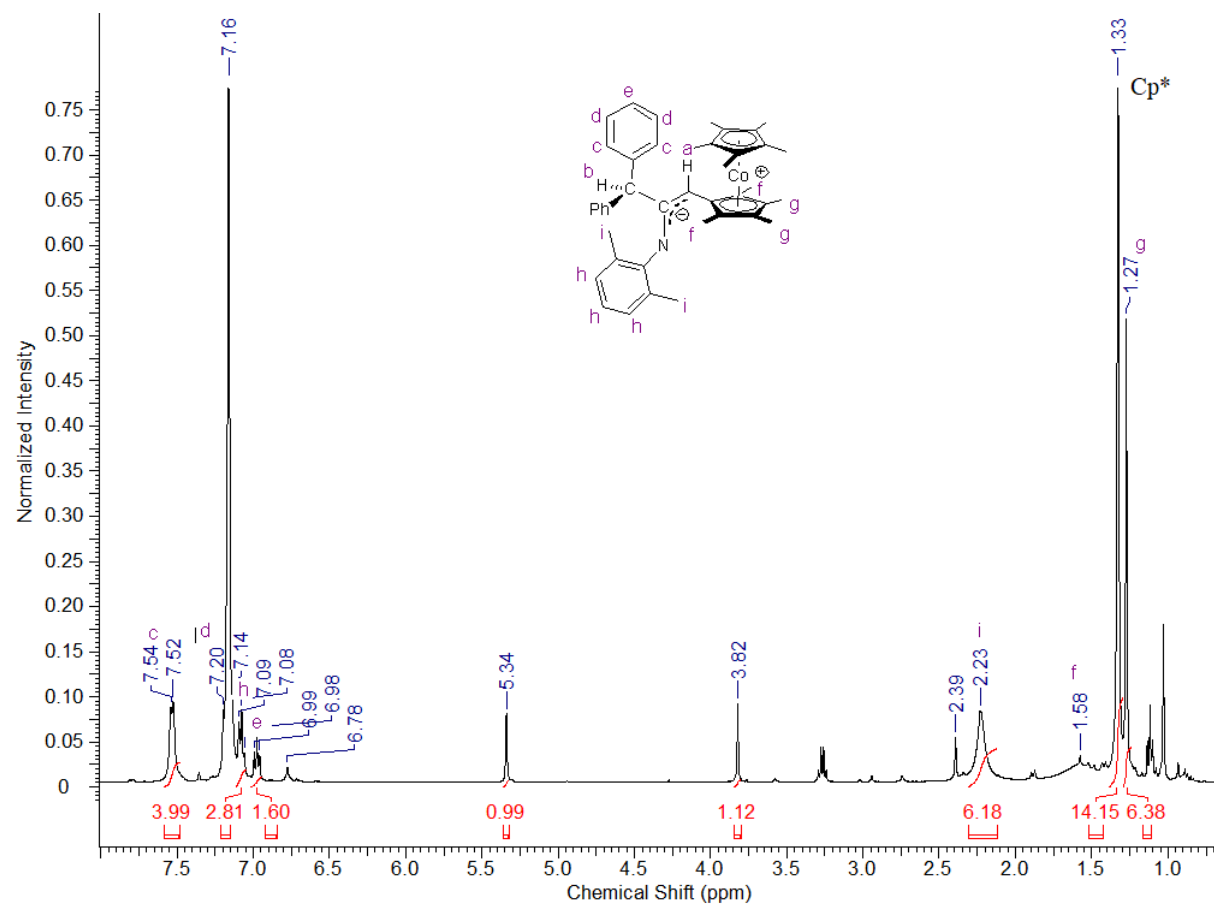

**Figure S6.**  $^1\text{H}$  NMR spectrum of **6**.

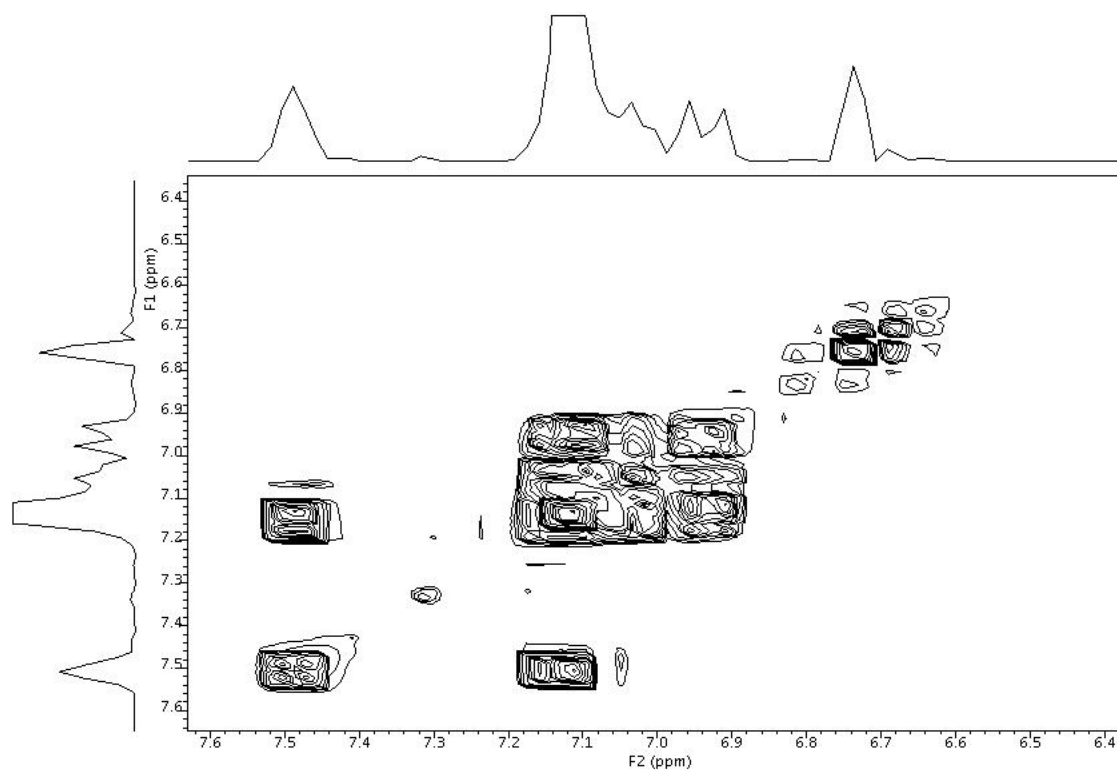

**Figure S7.**  $^1\text{H}$ - $^1\text{H}$  COSY NMR spectrum of **6**.

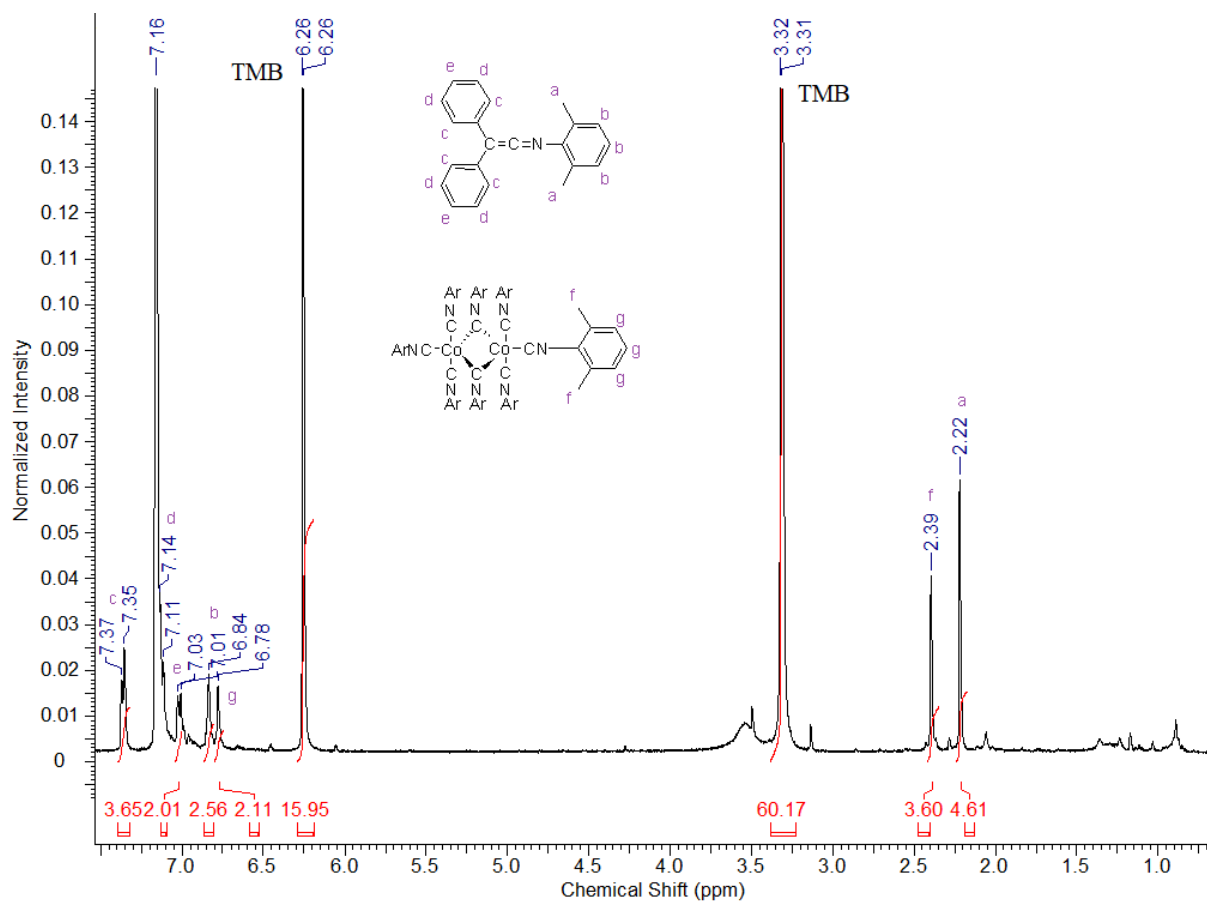

**Figure S8.**  $^1\text{H}$  NMR spectrum of the reaction between  $[\text{Co}(\text{OR})_2(\text{CPh}_2)][\text{K}(18\text{-crown-}6)]$  and  $\text{CN-2,6-Me}_2\text{C}_6\text{H}_3$  to form  $\text{Ph}_2\text{C}=\text{C}=\text{N}-(2,6\text{-Me}_2\text{C}_6\text{H}_3)$  and  $\text{Co}_2(\text{CN-2,6-Me}_2\text{C}_6\text{H}_3)_8$ .



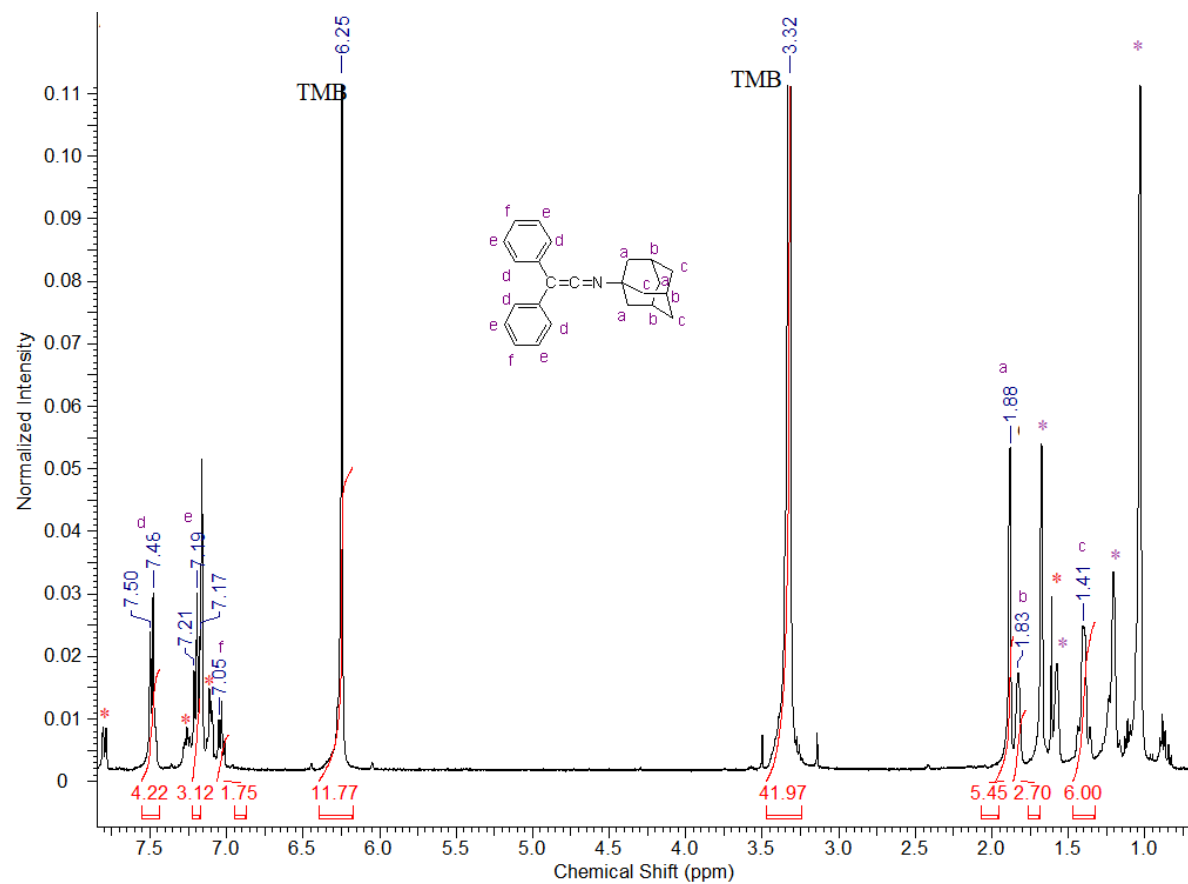

**Figure S9.**  $^1\text{H}$  NMR spectrum of the reaction between  $[\text{Co}(\text{OR})_2(\text{CPh}_2)][\text{CoCp}^*_2]$  and CNAd to form ketenimine. Purple asterisks denote free isocyanide and red asterisks denote HOR.

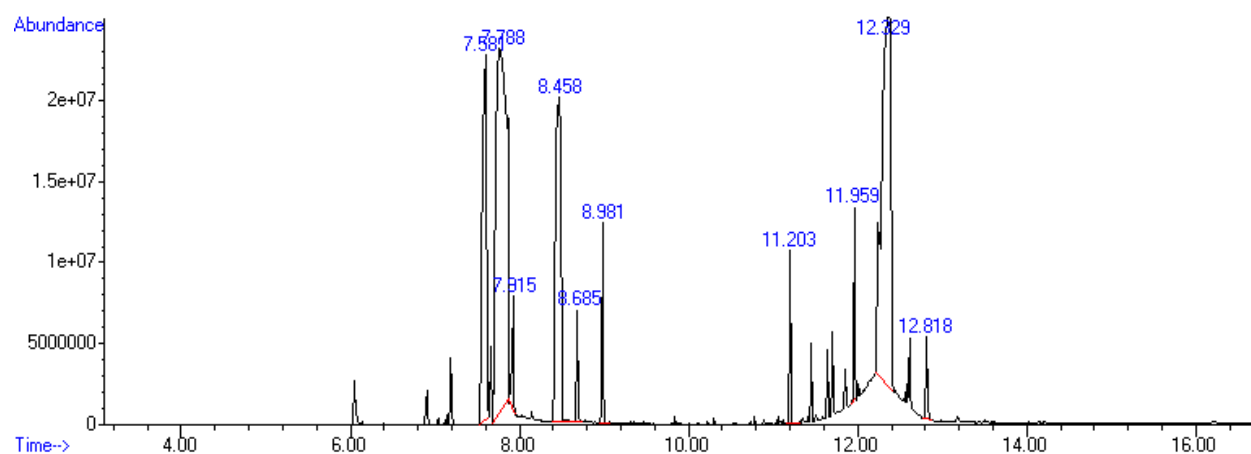

**Figure S10.** GC-MS of the filtered (silica plug) products mixture of the reaction between **3** and CNAd showing formation ketenimine (MS in **Figure S9** below).

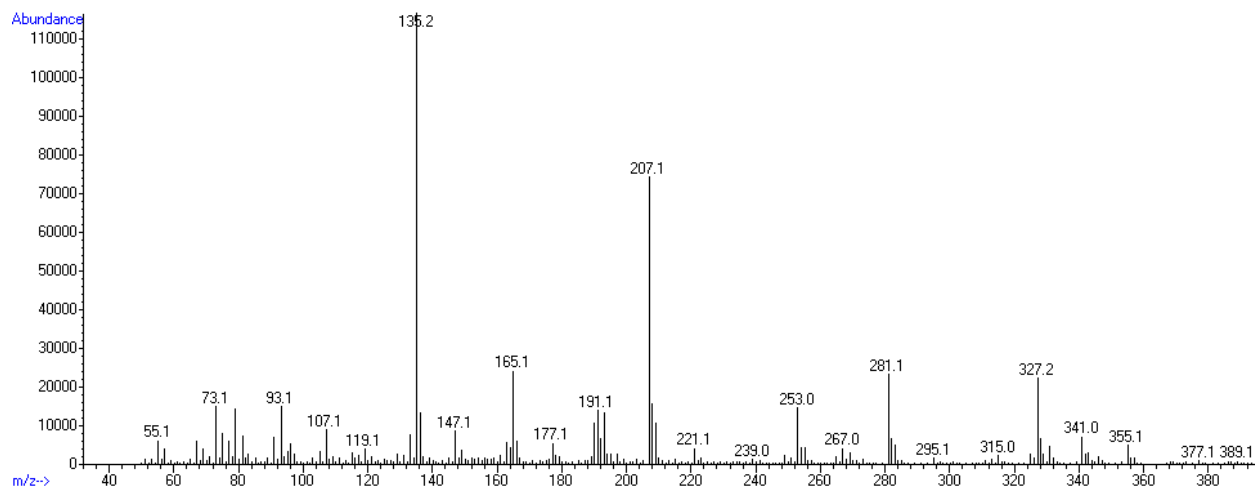

**Figure S11.** MS of the product eluting at 12.239 consistent with  $\text{Ph}_2\text{C}=\text{C}=\text{NAd}$  (calculate mass 327).

## 5. IR spectra

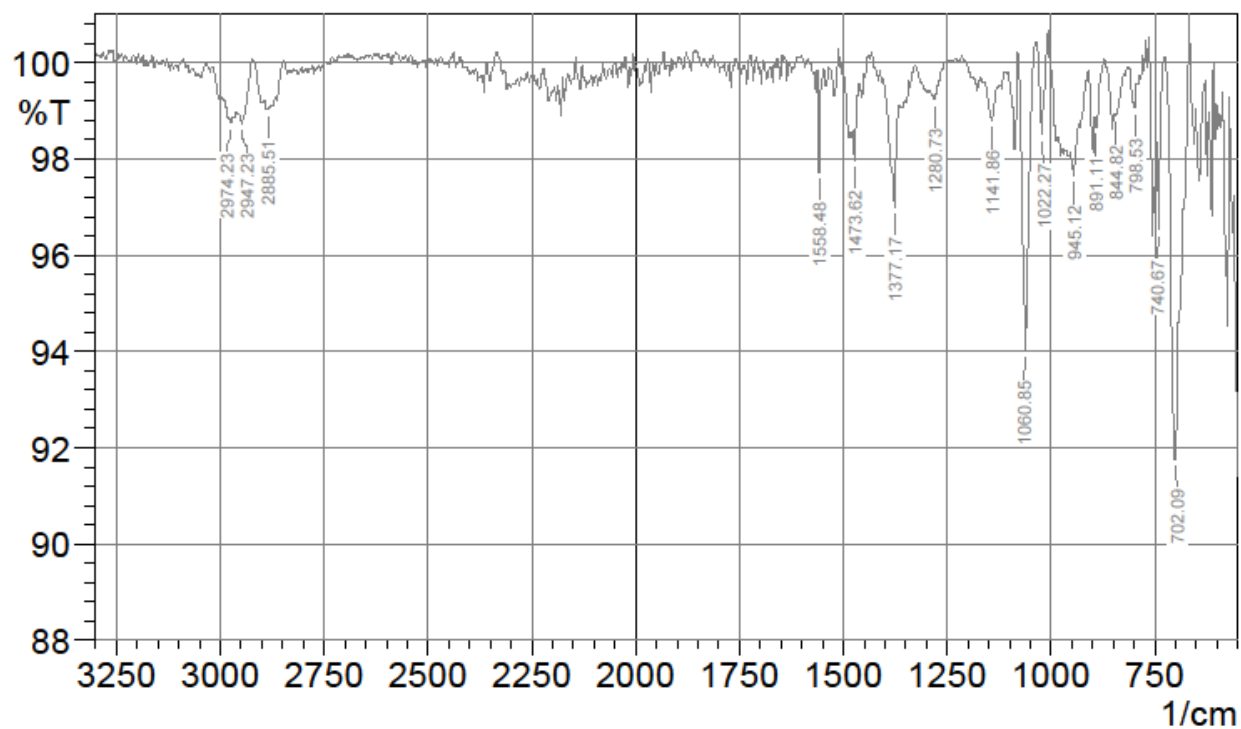

**Figure S12.** IR spectrum of  $[\text{Co}(\text{OR}_2)(\text{CPh}_2)][\text{CoCp}^*_2]$  (**3**).

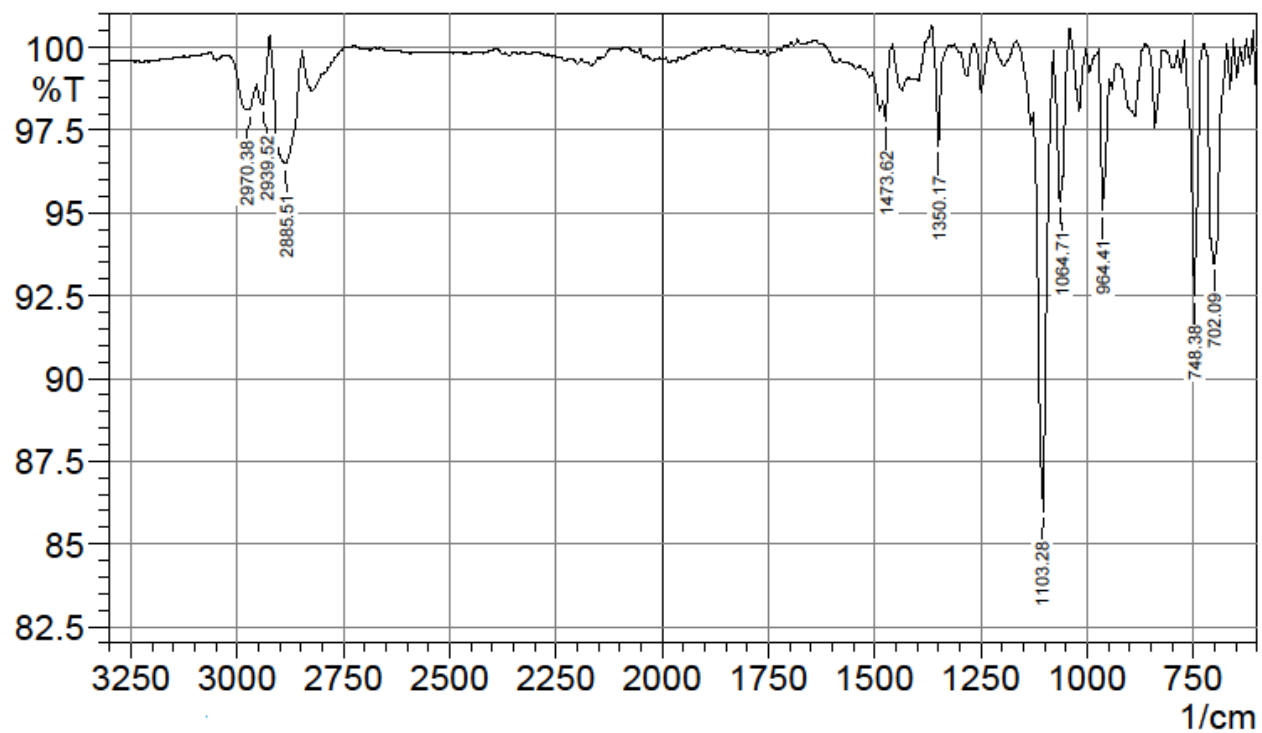

**Figure S13.** IR spectrum of  $[\text{Co}(\text{OR})_2(\text{CPh}_2)][\text{K}(18\text{-crown-}6)]$  (**4**).

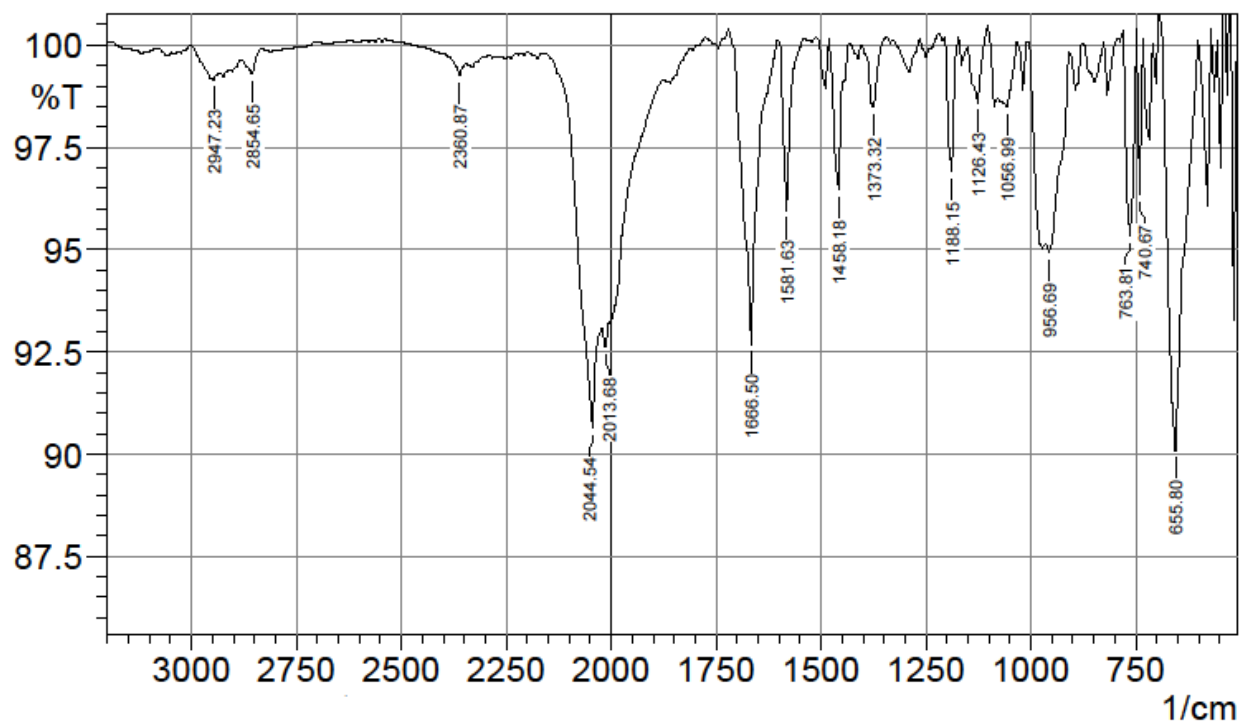

**Figure S14.** IR spectrum of **6**.

## 6. UV-vis spectra

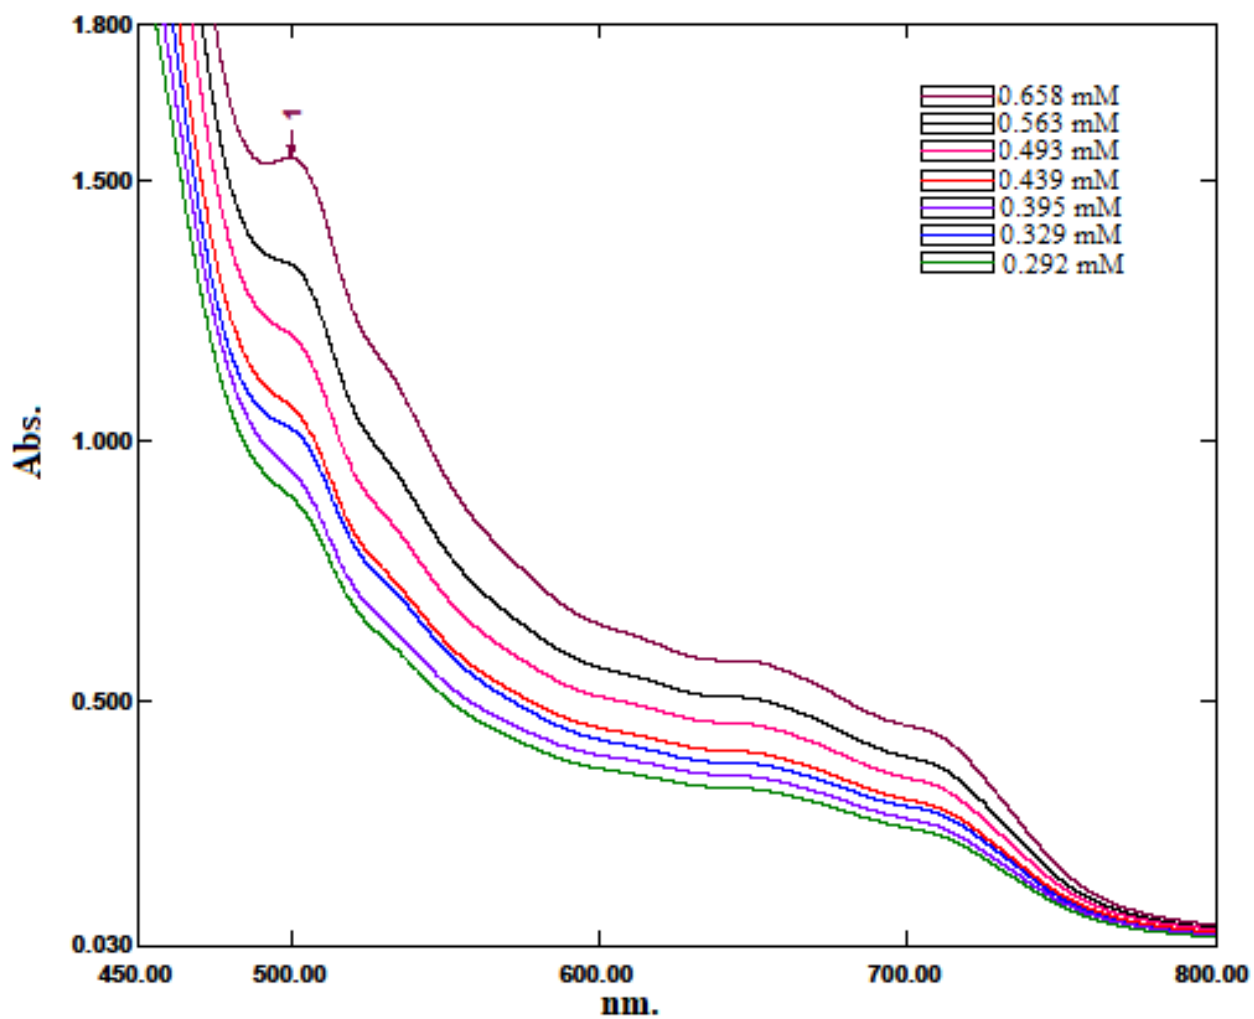

**Figure S15.** UV-Vis spectrum of  $[\text{Co}(\text{OR})_2(\text{CPh}_2)][\text{CoCp}^*_2]$  (3).

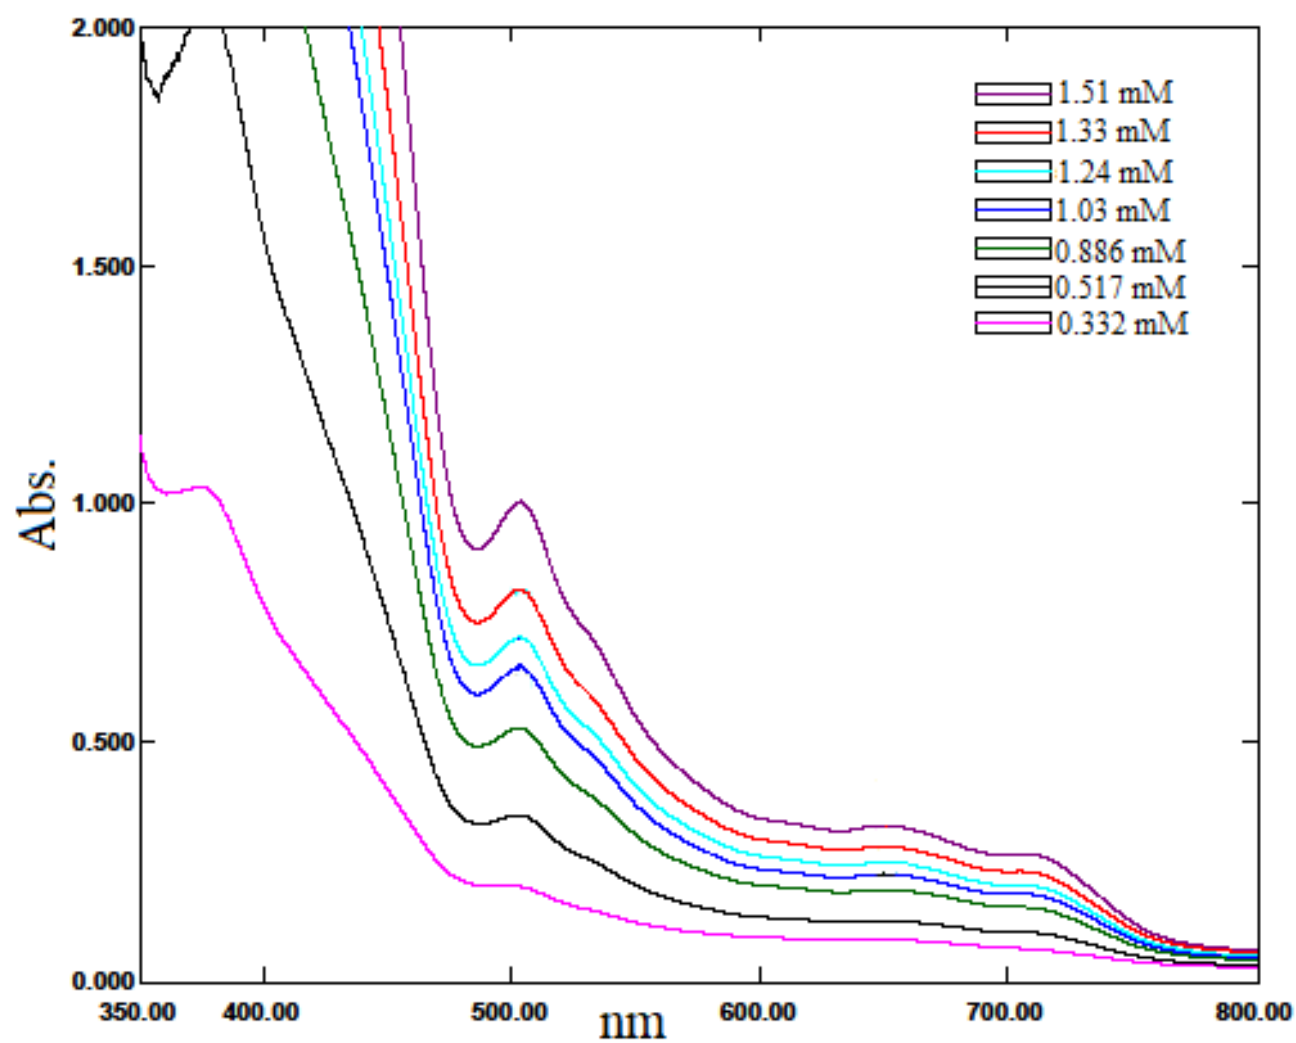

**Figure S16.** UV-Vis spectrum of [Co(OR)<sub>2</sub>(CPh<sub>2</sub>)] [K(18-crown-6)] (4).



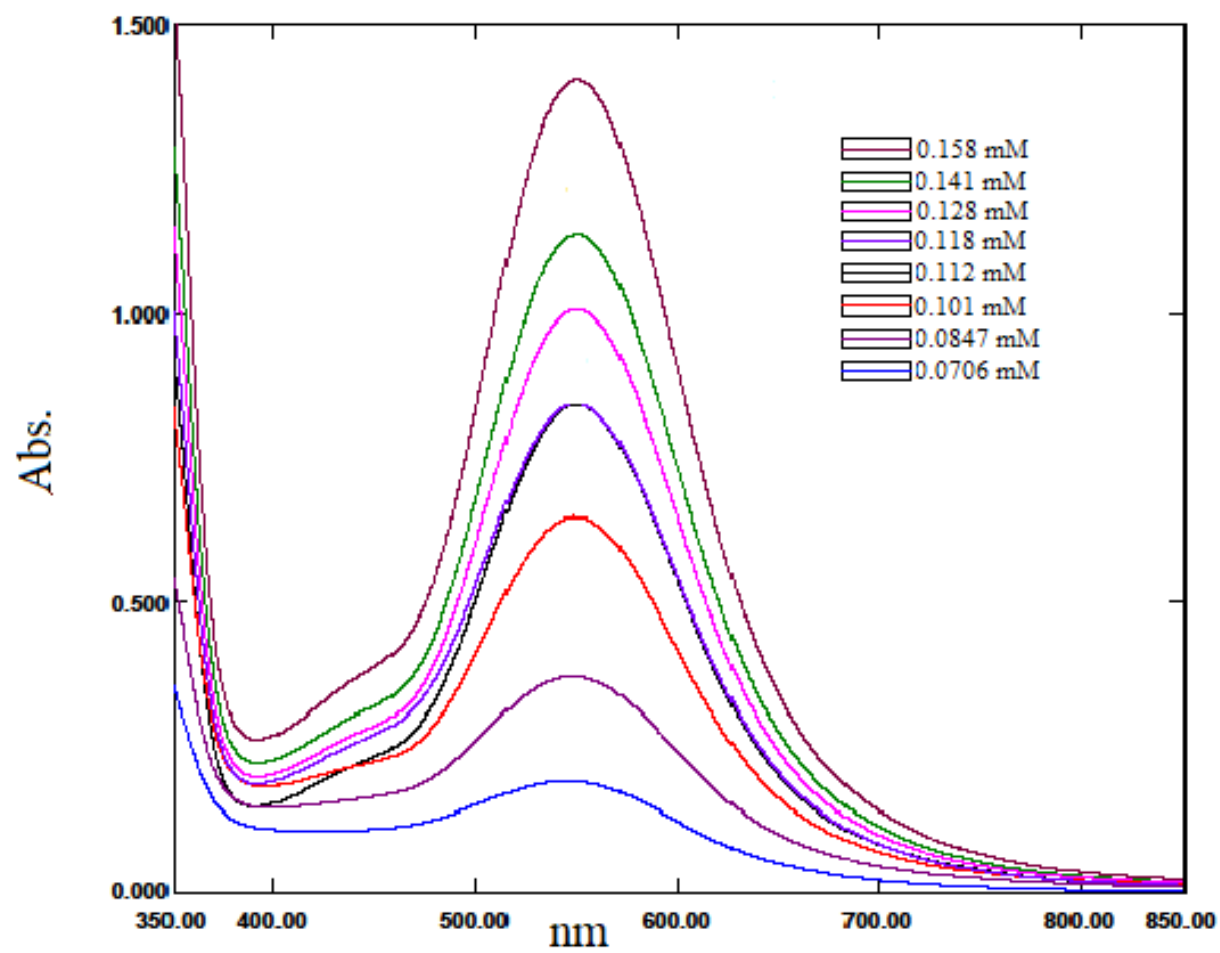

**Figure S17.** UV-Vis spectrum of **6**.

## 7. SQUID measurements

Solid state magnetic measurements were conducted on a Quantum Design Magnetic Properties Measurement System (QD-MPMS3). Data were collected under zero-field cooled (zfc) conditions from 2-300 K in an applied field of 1000 Oe. Observed magnetic moments were determined from Curie-Weiss fits. For the susceptibility of **2**, an appreciable temperature independent contribution was observed. For this reason, a modified Curie-Weiss law,  $\chi = \chi_o + C/(T - \theta)$  where  $\chi_o$  is the temperature independent term, was used. The raw data were corrected for sample shape and radial offset effects using the method reported by Morrison and zur Loye.<sup>7</sup>

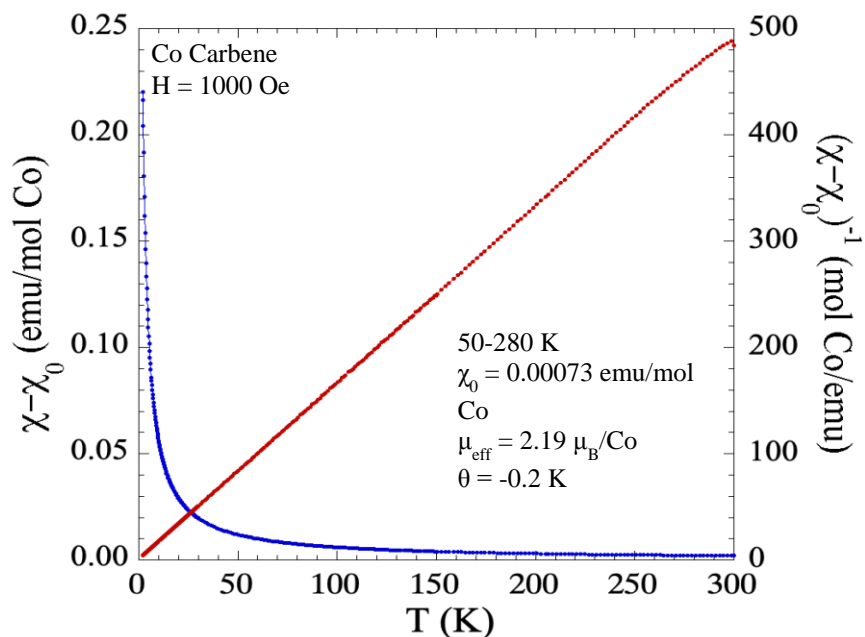

**Figure S18.** Magnetic susceptibility and inverse susceptibility for **2**.

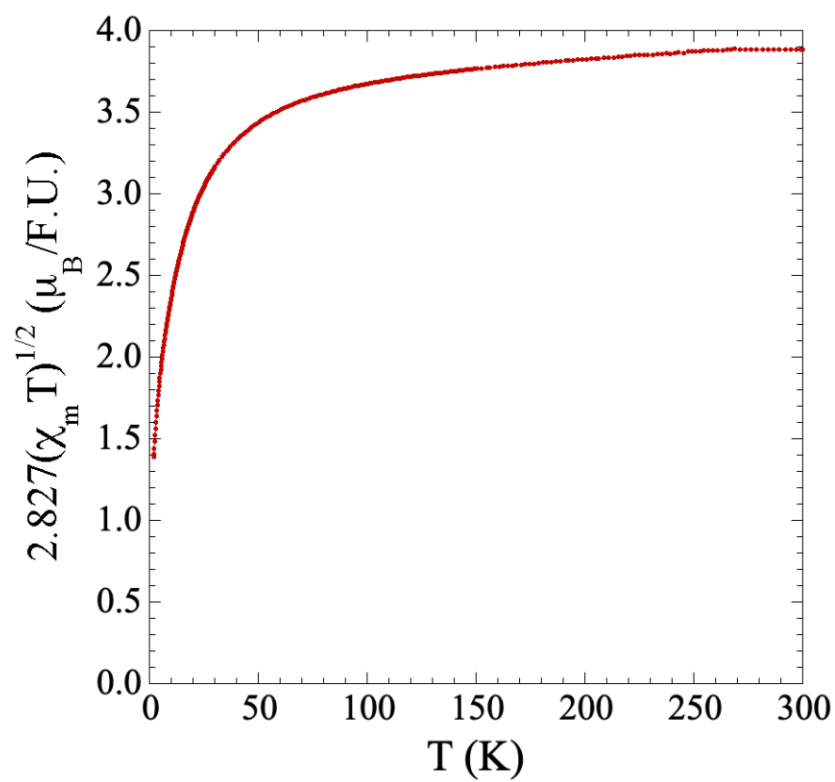

**Figure S19.** Magnetic moment of **3** estimated as  $2.827(\chi_M T)^{1/2}$ .

**Fitting of ChiT for 3.** The temperature dependent magnetic data for **3** were fit to Equation 3, which represents the magnetism of a “dimer” system with coupled  $S = 1/2$  and  $S = 3/2$  spins.

$$\chi_M = \frac{N g^2 \mu_B^2}{3k_B(T - \theta)} \frac{6 + 30e^{\frac{4J}{k_B T}}}{3 + 5e^{\frac{4J}{k_B T}}} \quad (3)$$

In this equation,  $N$  stands for Avogadro’s number,  $g$  for the Landé  $g$ -value,  $k_B$  for the Boltzmann’s constant, and  $J$  for the exchange coupling between the Co(II) and radical spins. Shown in Figure S20, several combinations of  $g$ ,  $J$ , and  $\theta$  can be used to fit the experimental  $\chi T$  data. As expected based on the system following the Curie-Weiss law for  $T > 10$  K, the data can be fit with  $g = 1.9$ ,  $\theta = -20.9$  K, and  $J/k_B = 0$ , Figure S20 (left), which is equivalent to the Curie-Weiss fit. As DFT data indicates antiferromagnetic coupling between the Co(II) and radical spins,  $J/k_B = 0$  K is not expected. The data can instead be fit with a small negative  $J/k_B$  ( $J/k_B \leq -10$  K) and a less negative theta. A fit using  $g = 1.85$ ,  $\theta = -3$  K, and  $J/k_B = -10$  K is shown in Figure S20 (right). Fits with  $J/k_B > -10$  K were not possible, indicating weak antiferromagnetic coupling between the spins within the dimer. Note that the Landé  $g$ -values less than 2 result from the observed moment,  $4.03 \mu_B/\text{F.U.}$ , being less than the calculated moment for an uncoupled dimer,  $4.24 \mu_B/\text{F.U.}$  As the solution moment agrees well with the calculated moment, the slightly lower than expected SQUID moment is presumed to be due to the slight degradation of the sample during shipping.

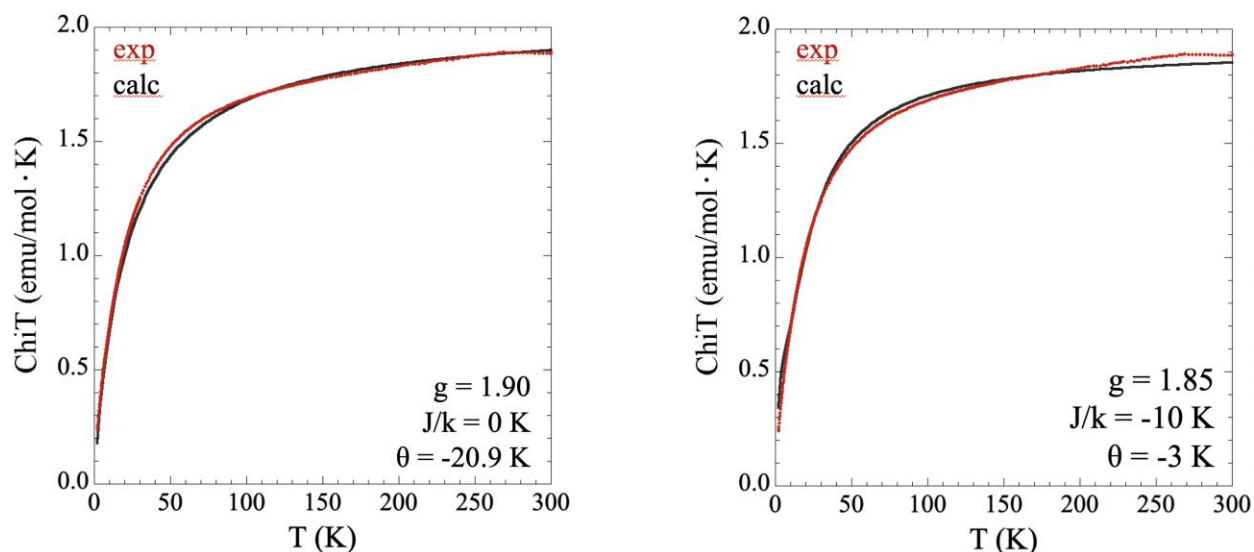

**Figure S20.** Two possible fits of the  $\chi T$  data for **3**.

## 8. Computational Data

Density functional theory calculations were carried out using Revision D01 of Gaussian 09.<sup>8</sup> Geometry optimizations were performed at the B3LYP/6-31G(d) level of theory.<sup>9</sup> All optimized structures were confirmed to have stable wavefunctions<sup>10</sup> and to be minima on the potential energy surface.<sup>11</sup> Cartesian coordinates may be found in the file titled “ReducedCarbene\_OptimizedStructures.xyz”, whereas frequencies and thermodynamics for each species may be found in Tables S4 and S5.

Two sets of states were optimized; a singlet and triplet whose initial guess wavefunctions correspond to low-spin Co(II) anti- or ferromagnetically coupled to carbene radical (**3'**  $S = 0$  and **3'**  $S = 1$ ) and a triplet and quintet corresponding to high-spin Co(II) anti- or ferromagnetically coupled to carbene radical (**3'**  $S = 1'$  and **3'**  $S = 2$ ). As evidenced by Table S3, the Mulliken spin analysis at the cobalt ion and carbene carbon for each of these states confirms these states though the higher energy triplet state has slightly more spin at Co and slightly less spin at C, suggesting more intermediate-spin Co(III) alkylidene character. The two lowest-energy states both demonstrate high-spin Co(II) character, consistent with the inferences from the crystallographic structures.

**Table S3.** Mulliken spins on the Co and C<sub>carbene</sub> atoms, as well as relative electronic and free energies (in kcal/mol).

|                        | Co spin | C spin | $\Delta E(\text{SCF})$ | $\Delta G(\text{gas})$ |
|------------------------|---------|--------|------------------------|------------------------|
| <b>3'</b> ( $S = 0$ )  | 1.06    | −0.70  | 16.96                  | 16.11                  |
| <b>3'</b> ( $S = 1$ )  | 1.40    | 0.26   | 15.23                  | 14.55                  |
| <b>3'</b> ( $S = 1'$ ) | 2.67    | −0.63  | 0.00                   | 0.00                   |
| <b>3'</b> ( $S = 2$ )  | 2.71    | 0.65   | 4.52                   | 0.97                   |

Because the quintet was so close in energy to the lowest energy state (**3'**  $S = 1'$ ), a more detailed analysis of the electronic structure of **3'**  $S = 2$  (beyond Mulliken spins) was performed. As shown in Figure S20, the singly occupied molecular orbitals of this quintet state confirm the AF/F-coupled nature of these two lowest-energy states. We repeated the analysis of the Mulliken spins assuming this state is lowest in energy due to the nearly isoenergonic nature of these triplet/quintet states. Mulliken spin analysis of the [Co(OR)<sub>2</sub>] and [CPh<sub>2</sub>] fragments shows spins of 2.97 and 1.03, in contrast to 1.89 and −0.89 for **2**. Thus, consistent with the conclusions for the antiferromagnetic state presented in the paper, other than the spin flip from the AF- to F-coupled state, the magnitude of the spin at the carbene carbon only changes by ~0.1 whereas the spin at cobalt changes by ~1.1, consistent with metal-centered reduction.

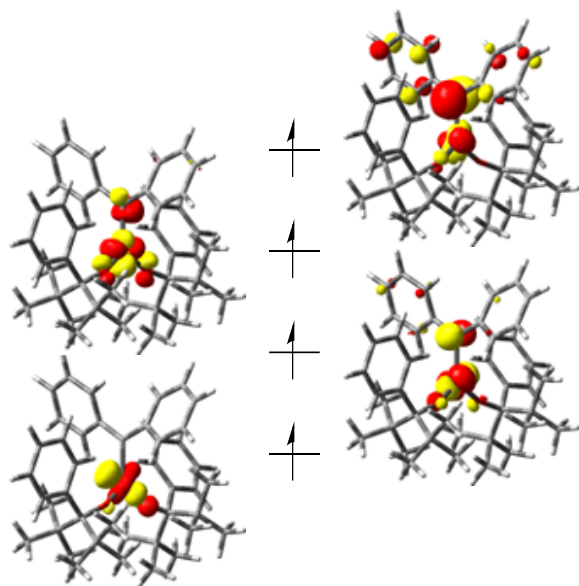

**Figure S21.** Corresponding orbitals (iso = 0.05 au) of **3'** S=2.

**Table S4.** Harmonic frequencies ( $\text{cm}^{-1}$ ) for the optimized species.

|          |          |          |
|----------|----------|----------|
| -----    |          |          |
| 3' (S=0) |          |          |
| -----    |          |          |
| 6.5697   | 11.9039  | 20.9884  |
| 27.5454  | 30.7284  | 35.0843  |
| 43.9544  | 50.5611  | 53.9536  |
| 55.3421  | 63.9911  | 68.1565  |
| 68.6707  | 73.6773  | 84.9052  |
| 88.1189  | 88.8255  | 92.0818  |
| 99.8264  | 115.8513 | 120.1861 |
| 125.0838 | 130.0122 | 164.3875 |
| 179.4148 | 186.0601 | 207.5179 |
| 211.7500 | 216.3747 | 223.2557 |
| 233.3355 | 233.7602 | 237.2208 |
| 248.6150 | 253.7240 | 256.8326 |
| 259.9074 | 268.6625 | 275.3712 |
| 278.3140 | 284.6316 | 288.8674 |
| 290.3346 | 296.0609 | 298.5487 |
| 303.5191 | 307.1848 | 310.9029 |
| 320.4819 | 328.0916 | 331.5082 |
| 333.0110 | 337.1695 | 339.8705 |
| 340.9686 | 351.7724 | 357.3591 |
| 362.2287 | 379.6447 | 391.1876 |
| 397.0466 | 410.2970 | 417.8573 |
| 419.9324 | 423.3925 | 426.2569 |
| 429.0223 | 430.9896 | 431.2026 |
| 432.2944 | 438.1942 | 441.2026 |

|           |           |           |
|-----------|-----------|-----------|
| 445.2463  | 446.8423  | 497.0755  |
| 511.1107  | 511.6736  | 561.3272  |
| 563.7855  | 564.1812  | 565.8127  |
| 570.3743  | 587.5436  | 629.5325  |
| 631.0884  | 635.7851  | 636.8137  |
| 657.0799  | 660.6971  | 669.3468  |
| 702.0359  | 707.0841  | 710.4635  |
| 720.0964  | 723.4811  | 724.1077  |
| 753.6944  | 755.9172  | 756.6541  |
| 766.8299  | 810.4468  | 813.2542  |
| 825.5560  | 828.7750  | 842.9947  |
| 855.3124  | 864.1477  | 867.7801  |
| 869.3129  | 889.6525  | 895.8661  |
| 896.2493  | 897.4381  | 903.2129  |
| 905.7423  | 918.9427  | 932.0025  |
| 935.7899  | 936.7404  | 937.4004  |
| 939.0630  | 940.1338  | 944.7782  |
| 948.9811  | 950.9326  | 953.3107  |
| 958.0411  | 963.5727  | 967.5323  |
| 968.9059  | 969.0208  | 972.2720  |
| 972.5977  | 973.6184  | 977.9677  |
| 987.5115  | 998.9376  | 1000.2936 |
| 1007.3366 | 1016.5391 | 1020.0333 |
| 1021.4914 | 1049.6543 | 1050.7766 |
| 1052.8624 | 1054.2438 | 1055.2993 |
| 1056.0735 | 1057.0181 | 1058.3921 |
| 1063.2716 | 1064.6643 | 1070.0026 |
| 1071.1461 | 1094.5090 | 1101.0624 |
| 1104.4219 | 1114.1549 | 1122.1055 |
| 1134.6022 | 1164.4869 | 1165.7438 |
| 1181.2539 | 1183.9597 | 1185.3392 |
| 1186.9110 | 1189.0528 | 1202.1371 |
| 1215.3626 | 1217.4486 | 1220.2018 |
| 1229.3444 | 1231.4109 | 1231.7136 |
| 1232.9894 | 1240.0887 | 1241.1085 |
| 1241.6423 | 1243.3328 | 1250.1024 |
| 1252.5645 | 1260.7558 | 1263.6188 |
| 1303.6719 | 1309.8511 | 1329.7408 |
| 1334.6355 | 1337.0582 | 1359.7980 |
| 1360.7479 | 1362.8362 | 1365.8094 |
| 1411.9019 | 1413.7517 | 1415.1669 |
| 1416.1247 | 1419.2469 | 1420.9205 |
| 1422.5429 | 1425.1106 | 1444.0401 |
| 1448.0287 | 1452.7943 | 1456.3267 |
| 1475.7910 | 1484.4963 | 1484.8403 |
| 1485.1451 | 1506.9612 | 1508.8888 |

|           |           |           |
|-----------|-----------|-----------|
| 1510.2699 | 1511.1035 | 1517.0709 |
| 1517.3172 | 1519.7633 | 1522.3496 |
| 1523.7905 | 1524.2734 | 1525.9693 |
| 1526.5848 | 1527.1750 | 1530.0755 |
| 1532.0783 | 1534.0100 | 1534.3629 |
| 1535.6358 | 1537.2761 | 1539.3296 |
| 1540.9099 | 1544.7161 | 1549.3864 |
| 1551.9547 | 1554.1912 | 1558.1820 |
| 1559.9715 | 1565.4236 | 1591.7673 |
| 1607.2974 | 1625.4735 | 1633.5036 |
| 1634.2103 | 1637.6035 | 1655.2157 |
| 1655.7241 | 3031.9438 | 3033.6041 |
| 3033.6564 | 3034.8407 | 3035.7939 |
| 3036.8785 | 3037.1229 | 3040.4297 |
| 3045.0616 | 3046.2457 | 3048.3857 |
| 3053.3285 | 3092.3021 | 3093.9527 |
| 3096.8850 | 3101.5736 | 3108.1867 |
| 3109.0567 | 3109.3036 | 3112.1440 |
| 3113.2349 | 3116.1228 | 3133.2562 |
| 3137.5825 | 3140.6803 | 3142.0463 |
| 3144.6149 | 3145.4010 | 3146.7909 |
| 3151.0916 | 3155.3659 | 3155.6192 |
| 3156.2394 | 3157.6479 | 3158.3941 |
| 3158.6864 | 3159.4166 | 3162.7301 |
| 3166.2718 | 3169.2333 | 3174.2017 |
| 3174.6747 | 3177.8345 | 3185.6384 |
| 3187.0644 | 3188.4514 | 3190.0439 |
| 3190.8305 | 3195.2746 | 3202.3514 |
| 3204.0408 | 3207.2279 | 3239.2640 |
| 3240.1289 | 3244.4010 | 3299.4078 |

-----  
3' (S=1)  
-----

|          |          |          |
|----------|----------|----------|
| 8.6942   | 11.7697  | 19.1899  |
| 27.5271  | 33.5695  | 39.1850  |
| 44.7979  | 48.9787  | 55.5682  |
| 61.7143  | 63.0032  | 67.0528  |
| 74.6835  | 77.2580  | 83.9659  |
| 85.8882  | 90.2087  | 94.1944  |
| 104.2587 | 116.1997 | 117.6148 |
| 133.5922 | 137.9818 | 175.6680 |
| 178.7928 | 190.0878 | 206.0897 |
| 215.6375 | 221.7489 | 224.3895 |
| 235.5830 | 237.3009 | 238.9565 |
| 248.2701 | 251.8138 | 261.8029 |



|           |           |           |
|-----------|-----------|-----------|
| 270.8075  | 273.6923  | 282.7623  |
| 288.0306  | 290.8452  | 292.5833  |
| 296.3302  | 299.1624  | 301.0961  |
| 303.1252  | 305.5851  | 312.5185  |
| 322.6984  | 328.8424  | 333.7003  |
| 336.1623  | 337.4300  | 341.6563  |
| 342.8219  | 355.6701  | 361.7981  |
| 367.9036  | 385.8645  | 386.2914  |
| 395.0881  | 407.5708  | 418.8809  |
| 421.4640  | 425.2336  | 426.3672  |
| 428.1482  | 431.0518  | 432.5442  |
| 434.3158  | 438.9362  | 444.4275  |
| 446.2491  | 448.4461  | 501.2806  |
| 511.1586  | 513.0682  | 517.8124  |
| 561.7402  | 563.7963  | 565.9897  |
| 568.3566  | 588.0090  | 630.6356  |
| 631.7201  | 635.8729  | 636.0727  |
| 659.3226  | 662.3795  | 680.3741  |
| 701.1594  | 707.8167  | 716.8177  |
| 718.9807  | 722.6515  | 728.7050  |
| 748.4641  | 750.7925  | 754.2934  |
| 756.4435  | 810.4331  | 813.2102  |
| 826.4434  | 828.9232  | 839.8769  |
| 850.0018  | 861.0518  | 864.6195  |
| 880.6086  | 883.8075  | 894.8383  |
| 896.4039  | 897.5581  | 904.0453  |
| 905.2509  | 929.8311  | 934.0538  |
| 935.6150  | 936.4965  | 938.7655  |
| 939.6107  | 940.7789  | 946.4809  |
| 950.0075  | 951.5201  | 952.3596  |
| 953.3195  | 962.2398  | 964.6274  |
| 967.1058  | 968.4653  | 971.6770  |
| 973.2804  | 975.0365  | 975.4284  |
| 977.6126  | 991.8529  | 997.1298  |
| 1003.1697 | 1004.6354 | 1018.3479 |
| 1019.4926 | 1048.8739 | 1051.8215 |
| 1052.9863 | 1053.3566 | 1054.4056 |
| 1057.0604 | 1057.7374 | 1058.3235 |
| 1063.2417 | 1065.1918 | 1070.3174 |
| 1071.7094 | 1088.3534 | 1093.9417 |
| 1104.2358 | 1114.2048 | 1119.4249 |
| 1124.0147 | 1166.7808 | 1167.7884 |
| 1181.8415 | 1182.6985 | 1185.7404 |
| 1187.3662 | 1200.6867 | 1207.7865 |
| 1215.2598 | 1217.6423 | 1226.1957 |
| 1227.6150 | 1230.3247 | 1231.9492 |

|           |           |           |
|-----------|-----------|-----------|
| 1232.8956 | 1238.8643 | 1240.9573 |
| 1242.7482 | 1243.3673 | 1248.7510 |
| 1250.4210 | 1260.1723 | 1262.8468 |
| 1303.3607 | 1310.4551 | 1329.2003 |
| 1335.3525 | 1335.6815 | 1360.1148 |
| 1361.6214 | 1365.1544 | 1368.4932 |
| 1413.8222 | 1415.9218 | 1416.4897 |
| 1419.8226 | 1422.1407 | 1422.5369 |
| 1423.1466 | 1426.3663 | 1446.4976 |
| 1450.2636 | 1454.3285 | 1457.8910 |
| 1476.3494 | 1484.1792 | 1485.0752 |
| 1487.1029 | 1508.1047 | 1509.2651 |
| 1510.2421 | 1511.9279 | 1519.2596 |
| 1520.6327 | 1520.9813 | 1522.2321 |
| 1523.4114 | 1524.7934 | 1525.2544 |
| 1526.2057 | 1527.7447 | 1529.5439 |
| 1532.5125 | 1533.8926 | 1535.2134 |
| 1535.8311 | 1538.4666 | 1540.8585 |
| 1544.4654 | 1545.6048 | 1547.5242 |
| 1553.0937 | 1554.9042 | 1557.3750 |
| 1559.9327 | 1564.8237 | 1593.3227 |
| 1599.7349 | 1628.1224 | 1634.2768 |
| 1634.4491 | 1643.9811 | 1656.0053 |
| 1656.2114 | 3034.4771 | 3035.0858 |
| 3035.5414 | 3036.5549 | 3037.7740 |
| 3038.3559 | 3040.1216 | 3042.9944 |
| 3047.0104 | 3047.1518 | 3051.1869 |
| 3055.7926 | 3093.8854 | 3095.0186 |
| 3099.3121 | 3100.6977 | 3111.4073 |
| 3111.8066 | 3113.6668 | 3114.0103 |
| 3117.0392 | 3119.1613 | 3137.4510 |
| 3141.5352 | 3142.2822 | 3143.2680 |
| 3147.2847 | 3147.9630 | 3149.6046 |
| 3152.5654 | 3153.8028 | 3154.7668 |
| 3156.0927 | 3157.4702 | 3158.1520 |
| 3159.1830 | 3159.2828 | 3161.8854 |
| 3162.8098 | 3163.1649 | 3175.4089 |
| 3176.5344 | 3178.9079 | 3185.2940 |
| 3186.0159 | 3186.8344 | 3191.2436 |
| 3193.1116 | 3198.5868 | 3201.3169 |
| 3203.6475 | 3205.1301 | 3242.5113 |
| 3244.3965 | 3254.9773 | 3298.4195 |

-----  
3' (S=1')  
-----

|          |          |           |
|----------|----------|-----------|
| 15.6456  | 20.7322  | 22.9462   |
| 29.0569  | 34.9960  | 38.4349   |
| 45.1812  | 49.4937  | 52.9199   |
| 54.1931  | 59.6791  | 65.5857   |
| 69.3520  | 72.2032  | 82.4206   |
| 88.8979  | 93.1001  | 94.7284   |
| 100.4087 | 112.0016 | 121.9399  |
| 125.7933 | 137.4377 | 164.8260  |
| 181.9786 | 190.7073 | 203.4208  |
| 215.4195 | 219.6091 | 227.2827  |
| 233.1934 | 245.9027 | 251.6680  |
| 253.2133 | 257.3327 | 261.4099  |
| 265.9029 | 272.4299 | 276.3203  |
| 281.1477 | 288.8475 | 292.0274  |
| 296.7241 | 297.9716 | 301.5315  |
| 303.2596 | 306.9360 | 312.8897  |
| 314.9398 | 328.6063 | 331.1361  |
| 335.7511 | 339.3895 | 345.5404  |
| 349.1714 | 362.1625 | 370.3802  |
| 376.8878 | 381.5961 | 389.0597  |
| 393.3528 | 404.8175 | 417.1508  |
| 420.5239 | 426.6316 | 427.5668  |
| 429.7367 | 433.2707 | 434.9844  |
| 437.2855 | 438.4486 | 444.0567  |
| 448.0996 | 454.6701 | 498.5997  |
| 514.4096 | 517.2284 | 562.9257  |
| 564.3372 | 568.4404 | 569.1926  |
| 573.1542 | 587.8377 | 630.3481  |
| 631.1516 | 635.7563 | 635.9561  |
| 650.4107 | 656.9431 | 669.5480  |
| 703.2139 | 704.7712 | 711.4393  |
| 712.5447 | 720.9827 | 724.2608  |
| 756.1819 | 756.4229 | 759.3957  |
| 771.5895 | 812.5183 | 813.5428  |
| 827.0893 | 828.5544 | 849.6233  |
| 857.8581 | 864.5911 | 865.0709  |
| 866.6114 | 890.5160 | 892.5281  |
| 894.2515 | 906.2111 | 908.7282  |
| 909.7433 | 920.1172 | 933.6279  |
| 933.8445 | 938.7861 | 939.2568  |
| 941.0069 | 941.3608 | 947.2200  |
| 950.6561 | 953.4622 | 954.1091  |
| 962.7352 | 966.0864 | 967.4360  |
| 968.4538 | 970.3233 | 974.5611  |
| 975.9196 | 984.7686 | 986.9122  |
| 994.5822 | 994.7129 | 1003.6532 |

|           |           |           |
|-----------|-----------|-----------|
| 1005.8976 | 1006.1027 | 1016.9032 |
| 1018.0651 | 1047.4470 | 1052.7837 |
| 1053.6175 | 1054.0618 | 1055.0679 |
| 1055.9574 | 1057.4425 | 1057.7325 |
| 1061.7951 | 1065.2451 | 1069.7735 |
| 1072.0235 | 1091.1411 | 1098.3941 |
| 1104.8264 | 1114.2489 | 1119.8330 |
| 1131.4896 | 1159.2550 | 1160.8584 |
| 1180.1483 | 1183.1851 | 1183.9570 |
| 1184.4652 | 1186.6509 | 1202.9444 |
| 1212.0921 | 1216.6966 | 1219.0175 |
| 1227.7868 | 1229.3852 | 1231.0873 |
| 1233.2137 | 1239.6925 | 1241.0891 |
| 1242.5551 | 1243.4739 | 1249.5697 |
| 1252.0142 | 1260.4112 | 1260.9557 |
| 1295.3276 | 1309.6728 | 1330.0320 |
| 1332.0529 | 1335.2548 | 1356.5268 |
| 1359.8184 | 1362.9017 | 1365.7930 |
| 1412.7444 | 1414.6925 | 1417.1470 |
| 1418.2973 | 1419.6503 | 1421.5939 |
| 1425.1748 | 1427.5431 | 1447.8151 |
| 1447.9657 | 1455.3131 | 1456.5891 |
| 1477.1113 | 1483.4924 | 1484.1537 |
| 1485.6805 | 1506.9290 | 1508.5182 |
| 1514.1557 | 1516.4563 | 1519.2965 |
| 1520.5386 | 1521.7353 | 1523.2947 |
| 1523.5935 | 1524.8654 | 1525.7570 |
| 1528.0353 | 1529.6724 | 1530.8048 |
| 1534.0230 | 1534.8766 | 1536.3103 |
| 1536.8962 | 1539.9434 | 1541.6233 |
| 1545.7054 | 1546.7579 | 1550.1410 |
| 1553.4276 | 1555.9428 | 1556.7405 |
| 1561.2193 | 1567.4434 | 1601.2728 |
| 1606.5785 | 1628.8538 | 1632.4838 |
| 1633.3608 | 1638.4499 | 1654.3486 |
| 1654.9597 | 3030.5415 | 3033.3354 |
| 3033.7359 | 3036.7898 | 3038.1753 |
| 3038.4939 | 3039.8680 | 3040.4500 |
| 3045.0354 | 3048.1669 | 3050.2218 |
| 3051.5427 | 3094.4953 | 3096.7968 |
| 3098.3475 | 3098.8475 | 3106.4832 |
| 3109.1585 | 3109.3795 | 3109.6518 |
| 3111.9889 | 3114.8223 | 3123.3067 |
| 3137.0089 | 3140.3982 | 3142.7543 |
| 3145.4489 | 3148.1398 | 3148.8957 |
| 3150.6000 | 3152.6690 | 3156.6255 |

|           |           |           |
|-----------|-----------|-----------|
| 3156.8532 | 3157.6052 | 3157.7733 |
| 3157.8963 | 3168.5310 | 3168.7269 |
| 3169.3055 | 3170.1630 | 3172.5057 |
| 3174.8899 | 3185.2045 | 3185.9182 |
| 3186.6479 | 3186.9964 | 3188.9842 |
| 3190.9867 | 3195.3001 | 3196.5482 |
| 3199.3488 | 3204.8164 | 3243.3621 |
| 3247.1433 | 3250.1460 | 3266.8278 |

-----  
3' (S=2)  
-----

|          |          |          |
|----------|----------|----------|
| 6.5817   | 10.9882  | 18.7119  |
| 23.2972  | 25.3922  | 32.8414  |
| 36.1832  | 40.9317  | 44.2074  |
| 48.3081  | 55.7590  | 60.8221  |
| 62.9446  | 69.0819  | 72.3750  |
| 81.0692  | 81.2822  | 86.4431  |
| 97.1651  | 111.3832 | 112.5719 |
| 116.1996 | 139.8326 | 150.8969 |
| 160.5557 | 175.4653 | 192.3937 |
| 204.7132 | 211.1588 | 213.9551 |
| 223.4442 | 234.2554 | 235.1169 |
| 249.2785 | 252.7100 | 255.1627 |
| 258.7670 | 264.8469 | 273.3819 |
| 276.7447 | 287.4404 | 288.3782 |
| 292.6223 | 295.7838 | 300.2089 |
| 301.6544 | 307.9462 | 313.1233 |
| 315.2007 | 330.1412 | 333.5095 |
| 335.7556 | 338.4434 | 342.2309 |
| 344.0409 | 356.9228 | 364.4678 |
| 368.4510 | 371.5383 | 384.4631 |
| 398.3162 | 409.0608 | 411.8630 |
| 413.3935 | 420.7896 | 426.9416 |
| 429.2048 | 430.2412 | 432.4169 |
| 434.0624 | 438.8457 | 439.5310 |
| 446.4468 | 446.7650 | 494.5758 |
| 511.1633 | 513.2628 | 562.2589 |
| 562.9720 | 563.8933 | 565.5636 |
| 568.6243 | 586.7140 | 629.4261 |
| 630.1958 | 635.7977 | 636.1364 |
| 657.0370 | 659.6580 | 665.7977 |
| 701.4255 | 708.9216 | 710.6410 |
| 721.4873 | 723.1186 | 724.4490 |
| 755.0807 | 755.8999 | 756.7865 |
| 767.3168 | 810.5147 | 813.9117 |

|           |           |           |
|-----------|-----------|-----------|
| 824.6110  | 827.0459  | 841.0847  |
| 852.5403  | 863.8894  | 865.5288  |
| 867.2260  | 888.8593  | 894.5280  |
| 895.1875  | 897.7570  | 904.9014  |
| 908.4760  | 912.7432  | 934.3144  |
| 935.8453  | 936.9701  | 937.2471  |
| 939.5229  | 941.5277  | 948.6985  |
| 951.2004  | 954.3224  | 955.4213  |
| 957.8568  | 964.6560  | 965.6162  |
| 967.3151  | 971.3217  | 975.5129  |
| 976.0056  | 976.7207  | 980.5892  |
| 983.0118  | 999.1169  | 1002.7029 |
| 1003.3061 | 1008.3872 | 1018.3837 |
| 1019.6355 | 1050.5985 | 1051.9184 |
| 1053.0727 | 1054.1569 | 1055.6727 |
| 1057.1158 | 1057.5299 | 1058.0842 |
| 1063.3589 | 1065.7816 | 1069.7800 |
| 1071.2281 | 1098.7195 | 1103.5824 |
| 1105.6187 | 1115.0470 | 1126.0253 |
| 1142.9508 | 1160.4406 | 1163.4022 |
| 1181.2176 | 1182.7425 | 1185.6068 |
| 1186.5635 | 1193.7805 | 1200.1871 |
| 1215.2866 | 1216.3925 | 1222.6097 |
| 1229.5606 | 1230.9012 | 1232.4194 |
| 1233.0065 | 1240.3064 | 1241.2594 |
| 1241.9042 | 1243.0560 | 1250.7909 |
| 1251.0362 | 1260.5856 | 1261.6169 |
| 1303.3402 | 1307.4665 | 1327.0261 |
| 1334.4791 | 1334.7066 | 1359.1210 |
| 1360.2207 | 1361.6480 | 1365.4292 |
| 1410.8492 | 1414.0100 | 1415.3231 |
| 1417.4673 | 1419.8879 | 1420.7095 |
| 1422.2771 | 1424.6009 | 1445.4383 |
| 1448.2776 | 1453.0116 | 1456.4790 |
| 1474.9100 | 1483.5109 | 1484.1462 |
| 1484.3870 | 1507.1241 | 1508.0659 |
| 1510.2790 | 1511.3087 | 1514.2069 |
| 1518.1077 | 1520.5472 | 1520.5755 |
| 1521.6919 | 1522.5060 | 1523.7503 |
| 1526.1350 | 1527.4985 | 1529.7161 |
| 1533.3279 | 1534.2326 | 1535.1959 |
| 1535.9876 | 1538.6631 | 1540.1986 |
| 1543.0918 | 1543.3001 | 1549.5379 |
| 1552.1274 | 1555.1269 | 1557.4066 |
| 1562.2873 | 1564.8822 | 1592.3324 |
| 1599.6691 | 1621.9443 | 1633.2197 |

|           |           |           |
|-----------|-----------|-----------|
| 1633.3211 | 1634.8925 | 1655.0254 |
| 1655.4126 | 3032.2889 | 3033.5631 |
| 3034.4021 | 3034.5420 | 3035.1512 |
| 3037.0349 | 3039.5845 | 3041.6220 |
| 3045.7559 | 3046.5822 | 3050.8102 |
| 3053.7663 | 3093.1736 | 3094.8825 |
| 3097.2724 | 3098.2615 | 3105.5798 |
| 3108.4979 | 3112.5879 | 3113.7449 |
| 3113.9900 | 3118.0136 | 3136.0033 |
| 3138.5643 | 3138.9585 | 3140.6659 |
| 3143.1404 | 3146.9959 | 3150.6277 |
| 3152.4173 | 3154.3690 | 3155.8691 |
| 3156.6969 | 3158.3359 | 3158.8530 |
| 3160.0606 | 3160.5390 | 3164.5298 |
| 3165.9843 | 3166.6554 | 3174.6940 |
| 3174.7661 | 3175.9498 | 3180.7843 |
| 3185.0085 | 3190.5307 | 3190.5474 |
| 3190.9013 | 3191.0318 | 3194.6354 |
| 3200.7540 | 3206.7321 | 3242.6177 |
| 3243.6089 | 3248.3363 | 3270.8542 |

**Table S5.** Energies ( $E_h$ ) for the optimized species.

| Species                         | E(SCF)       | H(gas)       | G(gas)       |
|---------------------------------|--------------|--------------|--------------|
| <b>3' (<math>S = 0</math>)</b>  | -3205.394009 | -3204.460570 | -3204.593084 |
| <b>3' (<math>S = 1</math>)</b>  | -3205.396773 | -3204.463075 | -3204.595569 |
| <b>3' (<math>S = 1'</math>)</b> | -3205.421043 | -3204.487265 | -3204.618762 |
| <b>3' (<math>S = 2</math>)</b>  | -3205.413833 | -3204.480576 | -3204.617222 |

### 9. Scheme Demonstrating Quinoidal Distortion in the Structures of 2 and 3.

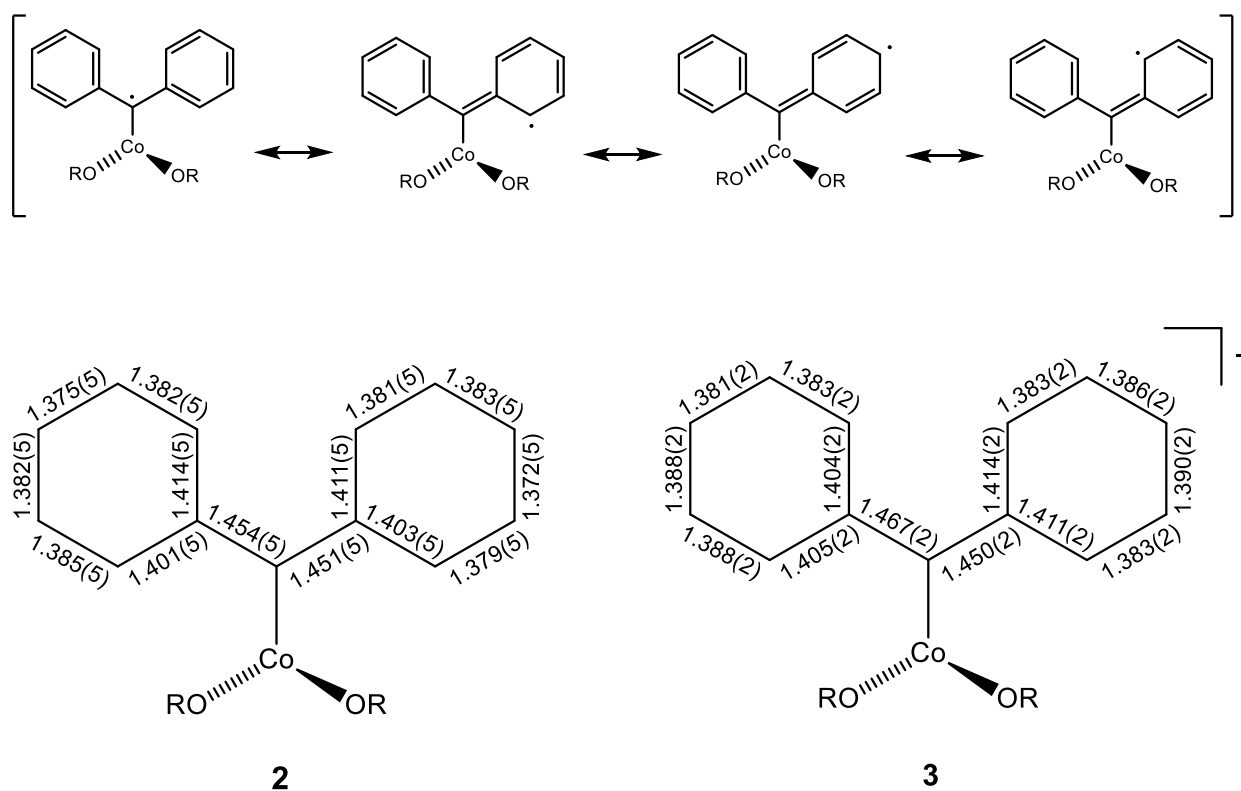

**Figure S22.** Top: Resonances structures (shown for only one of the two rings) demonstrating radical delocalization into the aryl rings of the carbene. Bottom: Carbene aryl bond distances in the structures of **2** and **3** consistent with quinoidal distortion.



## 10. References

1. J. A. Bellow, M. Yousif, D. Fang, E. G. Kratz, G. A. Cisneros and S. Groysman, *Inorg. Chem.* 2015, **54**, 5624- 5633.
2. J. A. Bellow, S. A. Stoian, J. Van Tol, A. Ozarowski, R. L. Lord and S. Groysman, *J. Am. Chem. Soc.* 2016, **138**, 5531-5534.
3. M. Hu, J. Rong, W. Miao, C. Ni, Y. Han and J. Hu, *Org. Lett.* 2014, **16**, 2030-2033.
4. (a) Y. Yamamoto and H. Yamazaki, *Inorg. Chem.* 1978, **17**, 3111-3114. (b) P. A. Leach, S. J. Geib, S. J. Corella, G. F. Garnock and N. J. Cooper, *J. Am. Chem. Soc.* 1994, **116**, 8566-8574.
5. A. Grass, N. S. Dewey, R. L. Lord and S. Groysman, *Organometallics* 2019, **38**, 962–972.
6. D. F. Evans, *J. Chem. Soc.*, 1959, 2003-2005.
7. G. Morrison and H.-C. zur Loye, *J. Solid State Chem.* 2015, **221**, 334-337.
8. Gaussian 09, Revision D.01, M. J. Frisch, G. W. Trucks, H. B. Schlegel, G. E. Scuseria, M. A. Robb, J. R. Cheeseman, G. Scalmani, V. Barone, B. Mennucci, G. A. Petersson, H. Nakatsuji, M. Caricato, X. Li, H. P. Hratchian, A. F. Izmaylov, J. Bloino, G. Zheng, J. L. Sonnenberg, M. Hada, M. Ehara, K. Toyota, R. Fukuda, J. Hasegawa, M. Ishida, T. Nakajima, Y. Honda, O. Kitao, H. Nakai, T. Vreven, J. A. Montgomery, Jr., J. E. Peralta, F. Ogliaro, M. Bearpark, J. J. Heyd, E. Brothers, K. N. Kudin, V. N. Staroverov, R. Kobayashi, J. Normand, K. Raghavachari, A. Rendell, J. C. Burant, S. S. Iyengar, J. Tomasi, M. Cossi, N. Rega, J. M. Millam, M. Klene, J. E. Knox, J. B. Cross, V. Bakken, C. Adamo, J. Jaramillo, R. Gomperts, R. E. Stratmann, O. Yazyev, A. J. Austin, R. Cammi, C. Pomelli, J. W. Ochterski, R. L. Martin, K. Morokuma, V. G. Zakrzewski, G. A. Voth, P. Salvador, J. J. Dannenberg, S. Dapprich, A. D. Daniels, Ö. Farkas, J. B. Foresman, J. V. Ortiz, J. Cioslowski, and D. J. Fox, Gaussian, Inc., Wallingford CT, 2009.
9. (a) S. H. Vosko, L. Wilk and M. Nusair, *Can. J. Phys.* 1980, **58**, 1200. (b) C. Lee, W. Yang and R.G. Parr, *Phys. Rev. B* 1988, **37**, 785. (c) A. D. Becke, *J. Chem. Phys.* 1993, **98**, 5648. (d) P.J. Stephens, F. J. Devlin, C. F. Chabalowski and M. J. Frisch, *J. Phys. Chem.* 1994, **98**, 11623.
10. (a) H. B. Schlegel and J. J. McDouall, in *Computational Advances in Organic Chemistry*; Oerter, C; Csizmadia, I. G., Eds.; Kluwer Academic: Amsterdam, The Netherlands, 1991. (b) R. Bauernschmitt and R. Ahlrichs, *J. Chem. Phys.* 1996, **104**, 9047.
11. H. B. Schlegel, *WIREs Comput. Mol. Sci.* 2011, **1**, 790.
